# Supplementary material for: Patient and Caregiver Perceptions of Airway Clearance Methods Used for Cystic Fibrosis
Source: Hindawi journal article supplement (doi:10.1155/2023/1422319), 2023-07-28
Supplement: f1 [file 1422319.f1.zip]

# Data Dictionary Codebook

05/05/2022 2:27pm

| #                                                                                                                                     | Variable / Field Name   | Field Label<br>Field Note                                                                                                                                                                                                                                                                                                                                                                                                                                                                                                                                                                                                                                                                                                                                                                                                                                                                                                                                                                                                                                                                                                                                                                                                                                                                                                                                                                                                                                                                                                                                                                                                                                                                                                                                                                                                                                                                                                                                                                                                                                                                                                                                                                                                                                                                                                                                                                                                                                                                                                                                                                                                                                                                                                                                                                                                                                                                                           | Field Attributes (Field Type, Validation, Choices, Calculations, etc.)                                                                                                                                          |
|---------------------------------------------------------------------------------------------------------------------------------------|-------------------------|---------------------------------------------------------------------------------------------------------------------------------------------------------------------------------------------------------------------------------------------------------------------------------------------------------------------------------------------------------------------------------------------------------------------------------------------------------------------------------------------------------------------------------------------------------------------------------------------------------------------------------------------------------------------------------------------------------------------------------------------------------------------------------------------------------------------------------------------------------------------------------------------------------------------------------------------------------------------------------------------------------------------------------------------------------------------------------------------------------------------------------------------------------------------------------------------------------------------------------------------------------------------------------------------------------------------------------------------------------------------------------------------------------------------------------------------------------------------------------------------------------------------------------------------------------------------------------------------------------------------------------------------------------------------------------------------------------------------------------------------------------------------------------------------------------------------------------------------------------------------------------------------------------------------------------------------------------------------------------------------------------------------------------------------------------------------------------------------------------------------------------------------------------------------------------------------------------------------------------------------------------------------------------------------------------------------------------------------------------------------------------------------------------------------------------------------------------------------------------------------------------------------------------------------------------------------------------------------------------------------------------------------------------------------------------------------------------------------------------------------------------------------------------------------------------------------------------------------------------------------------------------------------------------------|-----------------------------------------------------------------------------------------------------------------------------------------------------------------------------------------------------------------|
| Instrument: PT Survey (pt_survey)  Enabled as survey |                         |                                                                                                                                                                                                                                                                                                                                                                                                                                                                                                                                                                                                                                                                                                                                                                                                                                                                                                                                                                                                                                                                                                                                                                                                                                                                                                                                                                                                                                                                                                                                                                                                                                                                                                                                                                                                                                                                                                                                                                                                                                                                                                                                                                                                                                                                                                                                                                                                                                                                                                                                                                                                                                                                                                                                                                                                                                                                                                                     |                                                                                                                                                                                                                 |
| 1                                                                                                                                     | [ record_id ]           | Record ID                                                                                                                                                                                                                                                                                                                                                                                                                                                                                                                                                                                                                                                                                                                                                                                                                                                                                                                                                                                                                                                                                                                                                                                                                                                                                                                                                                                                                                                                                                                                                                                                                                                                                                                                                                                                                                                                                                                                                                                                                                                                                                                                                                                                                                                                                                                                                                                                                                                                                                                                                                                                                                                                                                                                                                                                                                                                                                           | text                                                                                                                                                                                                            |
| 2                                                                                                                                     | [ consent ]             | <p>Section Header: <i>[If you are an adult or a minor child who will complete the survey, 'you' means 'you'. If you are a parent/guardian completing the survey for your child, 'you' means 'your child']</i> We are inviting you to participate in a research study. The purpose of the study is to determine which types of airway clearance you use and why you may or may not use them routinely. We are inviting you to be in this study because you have cystic fibrosis. Approximately 200 people will take part in this study at the University of Iowa. If you agree to participate, we would like you to complete the following survey, which will take about 10 minutes. If you do not want to participate, you may exit the survey. You are free to skip any questions you would prefer not to answer. The information you provide may be used in separate future research studies. We will keep the information you provide confidential, however federal regulatory agencies and the University of Iowa Institutional Review Board (a committee that reviews and approves research studies) may inspect and copy records pertaining to this research. None of the information we collect will be able to identify you individually and we will not maintain a link between you and your data. This data can be used for future research, but again, you will not be able to be individually identified. If we write a report about this study we will do so in such a way that you cannot be identified. There are no known risks from being in this study, and you will not benefit personally. However, we hope that others may benefit in the future from what we learn as a result of this study. You will not have any costs for being in this research study. You will not be paid for being in this research study. Taking part in this research study is completely voluntary. If you decide not to be in this study, or if you stop participating at any time, you won't be penalized or lose any benefits for which you otherwise qualify. If you have any questions about the research study itself, please contact Anthony Fischer at 319-356-6992. If you experience a research-related injury, please contact: Anthony Fischer at 319-356-6992. If you have questions about the rights of research subjects, please contact the Human Subjects Office, 105 Hardin Library for the Health Sciences, 600 Newton Rd, The University of Iowa, Iowa City, IA 52242-1098, (319) 335-6564, or e-mail irb@uiowa.edu. To offer input about your experiences as a research subject or to speak to someone other than the research staff, call the Human Subjects Office at the number above. Thank you very much for your consideration. Sincerely, Anthony Fischer, MD</p> <p>Do you agree to participate in this survey? You may withdraw your participation at any time during the survey.</p> | <div>yesno</div> <div><div>1 Yes</div><div>0 No</div></div> <div>Stop actions on 0</div>                                                                                                                        |
| 3                                                                                                                                     | [ who_filled_out ]      | <p>Section Header: <i>Who is filling out this survey?</i></p> <p>Are you the patient or the caregiver (parent / legal guardian)?</p>                                                                                                                                                                                                                                                                                                                                                                                                                                                                                                                                                                                                                                                                                                                                                                                                                                                                                                                                                                                                                                                                                                                                                                                                                                                                                                                                                                                                                                                                                                                                                                                                                                                                                                                                                                                                                                                                                                                                                                                                                                                                                                                                                                                                                                                                                                                                                                                                                                                                                                                                                                                                                                                                                                                                                                                | <div>radio</div> <div><div>1 Patient (17 years or younger)</div><div>2 Patient (18 years or older)</div><div>3 Parent / Legal Guardian</div></div>                                                              |
| 4                                                                                                                                     | [ year_of_birth ]       | <p>Section Header: <i>Demographics</i></p> <p>Patient's Year of Birth</p>                                                                                                                                                                                                                                                                                                                                                                                                                                                                                                                                                                                                                                                                                                                                                                                                                                                                                                                                                                                                                                                                                                                                                                                                                                                                                                                                                                                                                                                                                                                                                                                                                                                                                                                                                                                                                                                                                                                                                                                                                                                                                                                                                                                                                                                                                                                                                                                                                                                                                                                                                                                                                                                                                                                                                                                                                                           | text (integer, Min: 1920, Max: 2020), Identifier                                                                                                                                                                |
| 5                                                                                                                                     | [ patient_current_age ] | <p>Patient's age in years (whole number)</p> <p>example: if you are 12.5, enter 12</p>                                                                                                                                                                                                                                                                                                                                                                                                                                                                                                                                                                                                                                                                                                                                                                                                                                                                                                                                                                                                                                                                                                                                                                                                                                                                                                                                                                                                                                                                                                                                                                                                                                                                                                                                                                                                                                                                                                                                                                                                                                                                                                                                                                                                                                                                                                                                                                                                                                                                                                                                                                                                                                                                                                                                                                                                                              | text (integer, Min: 0, Max: 100), Identifier<br>Custom alignment: RH                                                                                                                                            |
| 6                                                                                                                                     | [ gender ]              | Patient's Gender                                                                                                                                                                                                                                                                                                                                                                                                                                                                                                                                                                                                                                                                                                                                                                                                                                                                                                                                                                                                                                                                                                                                                                                                                                                                                                                                                                                                                                                                                                                                                                                                                                                                                                                                                                                                                                                                                                                                                                                                                                                                                                                                                                                                                                                                                                                                                                                                                                                                                                                                                                                                                                                                                                                                                                                                                                                                                                    | <div>radio, Identifier</div> <div><div>1 Male</div><div>2 Female</div><div>3 Non-binary</div><div>4 Transgender female</div><div>5 Transgender male</div><div>6 Other</div><div>7 Prefer not to say</div></div> |

|    |                                                             |                                                                                                                                       |                                                                                                                                                                                                                                                                                                                                                                                                                                                                                                                                                                                                                                                                                                                                                 |   |                      |                              |                          |              |                                             |   |                   |                                              |                            |              |                                                                           |   |              |                                |   |              |               |   |              |       |   |              |              |
|----|-------------------------------------------------------------|---------------------------------------------------------------------------------------------------------------------------------------|-------------------------------------------------------------------------------------------------------------------------------------------------------------------------------------------------------------------------------------------------------------------------------------------------------------------------------------------------------------------------------------------------------------------------------------------------------------------------------------------------------------------------------------------------------------------------------------------------------------------------------------------------------------------------------------------------------------------------------------------------|---|----------------------|------------------------------|--------------------------|--------------|---------------------------------------------|---|-------------------|----------------------------------------------|----------------------------|--------------|---------------------------------------------------------------------------|---|--------------|--------------------------------|---|--------------|---------------|---|--------------|-------|---|--------------|--------------|
| 7  | [chest_binder]<br>Show the field ONLY if:<br>[gender] = '5' | Do you (THE PATIENT) currently use a chest binder?                                                                                    | yesno<br><table border="1"> <tr> <td>1</td> <td>Yes</td> </tr> <tr> <td>0</td> <td>No</td> </tr> </table>                                                                                                                                                                                                                                                                                                                                                                                                                                                                                                                                                                                                                                       | 1 | Yes                  | 0                            | No                       |              |                                             |   |                   |                                              |                            |              |                                                                           |   |              |                                |   |              |               |   |              |       |   |              |              |
| 1  | Yes                                                         |                                                                                                                                       |                                                                                                                                                                                                                                                                                                                                                                                                                                                                                                                                                                                                                                                                                                                                                 |   |                      |                              |                          |              |                                             |   |                   |                                              |                            |              |                                                                           |   |              |                                |   |              |               |   |              |       |   |              |              |
| 0  | No                                                          |                                                                                                                                       |                                                                                                                                                                                                                                                                                                                                                                                                                                                                                                                                                                                                                                                                                                                                                 |   |                      |                              |                          |              |                                             |   |                   |                                              |                            |              |                                                                           |   |              |                                |   |              |               |   |              |       |   |              |              |
| 8  | [disclaimer1]                                               | For the duration of the survey, "you" or "your" or "I" refers to the patient                                                          | descriptive                                                                                                                                                                                                                                                                                                                                                                                                                                                                                                                                                                                                                                                                                                                                     |   |                      |                              |                          |              |                                             |   |                   |                                              |                            |              |                                                                           |   |              |                                |   |              |               |   |              |       |   |              |              |
| 9  | [time_on_treatments]                                        | Section Header: <i>Over the last two weeks:</i><br>How much time do you spend each day on your treatments?                            | radio<br><table border="1"> <tr> <td>1</td> <td>Less than 30 minutes</td> </tr> <tr> <td>2</td> <td>30 minutes to 59 minutes</td> </tr> <tr> <td>3</td> <td>1 to 2 hours</td> </tr> <tr> <td>4</td> <td>More than 2 hours</td> </tr> <tr> <td>5</td> <td>I don't take my treatments</td> </tr> <tr> <td>6</td> <td>I don't take my treatments unless I'm sick</td> </tr> <tr> <td>7</td> <td>I don't know</td> </tr> </table>                                                                                                                                                                                                                                                                                                                   | 1 | Less than 30 minutes | 2                            | 30 minutes to 59 minutes | 3            | 1 to 2 hours                                | 4 | More than 2 hours | 5                                            | I don't take my treatments | 6            | I don't take my treatments unless I'm sick                                | 7 | I don't know |                                |   |              |               |   |              |       |   |              |              |
| 1  | Less than 30 minutes                                        |                                                                                                                                       |                                                                                                                                                                                                                                                                                                                                                                                                                                                                                                                                                                                                                                                                                                                                                 |   |                      |                              |                          |              |                                             |   |                   |                                              |                            |              |                                                                           |   |              |                                |   |              |               |   |              |       |   |              |              |
| 2  | 30 minutes to 59 minutes                                    |                                                                                                                                       |                                                                                                                                                                                                                                                                                                                                                                                                                                                                                                                                                                                                                                                                                                                                                 |   |                      |                              |                          |              |                                             |   |                   |                                              |                            |              |                                                                           |   |              |                                |   |              |               |   |              |       |   |              |              |
| 3  | 1 to 2 hours                                                |                                                                                                                                       |                                                                                                                                                                                                                                                                                                                                                                                                                                                                                                                                                                                                                                                                                                                                                 |   |                      |                              |                          |              |                                             |   |                   |                                              |                            |              |                                                                           |   |              |                                |   |              |               |   |              |       |   |              |              |
| 4  | More than 2 hours                                           |                                                                                                                                       |                                                                                                                                                                                                                                                                                                                                                                                                                                                                                                                                                                                                                                                                                                                                                 |   |                      |                              |                          |              |                                             |   |                   |                                              |                            |              |                                                                           |   |              |                                |   |              |               |   |              |       |   |              |              |
| 5  | I don't take my treatments                                  |                                                                                                                                       |                                                                                                                                                                                                                                                                                                                                                                                                                                                                                                                                                                                                                                                                                                                                                 |   |                      |                              |                          |              |                                             |   |                   |                                              |                            |              |                                                                           |   |              |                                |   |              |               |   |              |       |   |              |              |
| 6  | I don't take my treatments unless I'm sick                  |                                                                                                                                       |                                                                                                                                                                                                                                                                                                                                                                                                                                                                                                                                                                                                                                                                                                                                                 |   |                      |                              |                          |              |                                             |   |                   |                                              |                            |              |                                                                           |   |              |                                |   |              |               |   |              |       |   |              |              |
| 7  | I don't know                                                |                                                                                                                                       |                                                                                                                                                                                                                                                                                                                                                                                                                                                                                                                                                                                                                                                                                                                                                 |   |                      |                              |                          |              |                                             |   |                   |                                              |                            |              |                                                                           |   |              |                                |   |              |               |   |              |       |   |              |              |
| 10 | [doing_treatments]                                          | How difficult is it for you to do your treatments (including medications and airway clearance) each day?                              | radio<br><table border="1"> <tr> <td>1</td> <td>Not at all</td> </tr> <tr> <td>2</td> <td>A little</td> </tr> <tr> <td>3</td> <td>Moderately</td> </tr> <tr> <td>4</td> <td>Very</td> </tr> </table>                                                                                                                                                                                                                                                                                                                                                                                                                                                                                                                                            | 1 | Not at all           | 2                            | A little                 | 3            | Moderately                                  | 4 | Very              |                                              |                            |              |                                                                           |   |              |                                |   |              |               |   |              |       |   |              |              |
| 1  | Not at all                                                  |                                                                                                                                       |                                                                                                                                                                                                                                                                                                                                                                                                                                                                                                                                                                                                                                                                                                                                                 |   |                      |                              |                          |              |                                             |   |                   |                                              |                            |              |                                                                           |   |              |                                |   |              |               |   |              |       |   |              |              |
| 2  | A little                                                    |                                                                                                                                       |                                                                                                                                                                                                                                                                                                                                                                                                                                                                                                                                                                                                                                                                                                                                                 |   |                      |                              |                          |              |                                             |   |                   |                                              |                            |              |                                                                           |   |              |                                |   |              |               |   |              |       |   |              |              |
| 3  | Moderately                                                  |                                                                                                                                       |                                                                                                                                                                                                                                                                                                                                                                                                                                                                                                                                                                                                                                                                                                                                                 |   |                      |                              |                          |              |                                             |   |                   |                                              |                            |              |                                                                           |   |              |                                |   |              |               |   |              |       |   |              |              |
| 4  | Very                                                        |                                                                                                                                       |                                                                                                                                                                                                                                                                                                                                                                                                                                                                                                                                                                                                                                                                                                                                                 |   |                      |                              |                          |              |                                             |   |                   |                                              |                            |              |                                                                           |   |              |                                |   |              |               |   |              |       |   |              |              |
| 11 | [treatments_daily_life]                                     | How much do your treatments make your daily life more difficult?                                                                      | radio<br><table border="1"> <tr> <td>1</td> <td>Not at all</td> </tr> <tr> <td>2</td> <td>A little</td> </tr> <tr> <td>3</td> <td>Moderately</td> </tr> <tr> <td>4</td> <td>A lot</td> </tr> </table>                                                                                                                                                                                                                                                                                                                                                                                                                                                                                                                                           | 1 | Not at all           | 2                            | A little                 | 3            | Moderately                                  | 4 | A lot             |                                              |                            |              |                                                                           |   |              |                                |   |              |               |   |              |       |   |              |              |
| 1  | Not at all                                                  |                                                                                                                                       |                                                                                                                                                                                                                                                                                                                                                                                                                                                                                                                                                                                                                                                                                                                                                 |   |                      |                              |                          |              |                                             |   |                   |                                              |                            |              |                                                                           |   |              |                                |   |              |               |   |              |       |   |              |              |
| 2  | A little                                                    |                                                                                                                                       |                                                                                                                                                                                                                                                                                                                                                                                                                                                                                                                                                                                                                                                                                                                                                 |   |                      |                              |                          |              |                                             |   |                   |                                              |                            |              |                                                                           |   |              |                                |   |              |               |   |              |       |   |              |              |
| 3  | Moderately                                                  |                                                                                                                                       |                                                                                                                                                                                                                                                                                                                                                                                                                                                                                                                                                                                                                                                                                                                                                 |   |                      |                              |                          |              |                                             |   |                   |                                              |                            |              |                                                                           |   |              |                                |   |              |               |   |              |       |   |              |              |
| 4  | A lot                                                       |                                                                                                                                       |                                                                                                                                                                                                                                                                                                                                                                                                                                                                                                                                                                                                                                                                                                                                                 |   |                      |                              |                          |              |                                             |   |                   |                                              |                            |              |                                                                           |   |              |                                |   |              |               |   |              |       |   |              |              |
| 12 | [overall_health]                                            | How is your overall health?                                                                                                           | radio<br><table border="1"> <tr> <td>1</td> <td>Excellent</td> </tr> <tr> <td>2</td> <td>Good</td> </tr> <tr> <td>3</td> <td>Fair</td> </tr> <tr> <td>4</td> <td>Poor</td> </tr> </table>                                                                                                                                                                                                                                                                                                                                                                                                                                                                                                                                                       | 1 | Excellent            | 2                            | Good                     | 3            | Fair                                        | 4 | Poor              |                                              |                            |              |                                                                           |   |              |                                |   |              |               |   |              |       |   |              |              |
| 1  | Excellent                                                   |                                                                                                                                       |                                                                                                                                                                                                                                                                                                                                                                                                                                                                                                                                                                                                                                                                                                                                                 |   |                      |                              |                          |              |                                             |   |                   |                                              |                            |              |                                                                           |   |              |                                |   |              |               |   |              |       |   |              |              |
| 2  | Good                                                        |                                                                                                                                       |                                                                                                                                                                                                                                                                                                                                                                                                                                                                                                                                                                                                                                                                                                                                                 |   |                      |                              |                          |              |                                             |   |                   |                                              |                            |              |                                                                           |   |              |                                |   |              |               |   |              |       |   |              |              |
| 3  | Fair                                                        |                                                                                                                                       |                                                                                                                                                                                                                                                                                                                                                                                                                                                                                                                                                                                                                                                                                                                                                 |   |                      |                              |                          |              |                                             |   |                   |                                              |                            |              |                                                                           |   |              |                                |   |              |               |   |              |       |   |              |              |
| 4  | Poor                                                        |                                                                                                                                       |                                                                                                                                                                                                                                                                                                                                                                                                                                                                                                                                                                                                                                                                                                                                                 |   |                      |                              |                          |              |                                             |   |                   |                                              |                            |              |                                                                           |   |              |                                |   |              |               |   |              |       |   |              |              |
| 13 | [fev_known]                                                 | Do you know your percent predicted forced expiratory volume (ppFEV1)?                                                                 | yesno<br><table border="1"> <tr> <td>1</td> <td>Yes</td> </tr> <tr> <td>0</td> <td>No</td> </tr> </table>                                                                                                                                                                                                                                                                                                                                                                                                                                                                                                                                                                                                                                       | 1 | Yes                  | 0                            | No                       |              |                                             |   |                   |                                              |                            |              |                                                                           |   |              |                                |   |              |               |   |              |       |   |              |              |
| 1  | Yes                                                         |                                                                                                                                       |                                                                                                                                                                                                                                                                                                                                                                                                                                                                                                                                                                                                                                                                                                                                                 |   |                      |                              |                          |              |                                             |   |                   |                                              |                            |              |                                                                           |   |              |                                |   |              |               |   |              |       |   |              |              |
| 0  | No                                                          |                                                                                                                                       |                                                                                                                                                                                                                                                                                                                                                                                                                                                                                                                                                                                                                                                                                                                                                 |   |                      |                              |                          |              |                                             |   |                   |                                              |                            |              |                                                                           |   |              |                                |   |              |               |   |              |       |   |              |              |
| 14 | [fev]<br>Show the field ONLY if:<br>[fev_known] = '1'       | What is your percent predicted forced expiratory volume (ppFEV1)?                                                                     | text (number)                                                                                                                                                                                                                                                                                                                                                                                                                                                                                                                                                                                                                                                                                                                                   |   |                      |                              |                          |              |                                             |   |                   |                                              |                            |              |                                                                           |   |              |                                |   |              |               |   |              |       |   |              |              |
| 15 | [ever_used]                                                 | Section Header: <i>Airway Clearance</i><br>In your life, which forms of airway clearance have you EVER USED?<br>Select ALL that apply | checkbox<br><table border="1"> <tr> <td>1</td> <td>ever_used__1</td> <td>Manual Percussion (Chest PT)</td> </tr> <tr> <td>2</td> <td>ever_used__2</td> <td>Intrapulmonary Percussive Ventilation (IPV)</td> </tr> <tr> <td>3</td> <td>ever_used__3</td> <td>High Frequency Chest Wall Oscillation (Vest)</td> </tr> <tr> <td>4</td> <td>ever_used__4</td> <td>Oscillating Positive Expiratory Pressure (PEP), e.g. Aerobika or Acapella</td> </tr> <tr> <td>5</td> <td>ever_used__5</td> <td>Vigorous Exercise e.g. running</td> </tr> <tr> <td>6</td> <td>ever_used__6</td> <td>Huff Coughing</td> </tr> <tr> <td>7</td> <td>ever_used__7</td> <td>Other</td> </tr> <tr> <td>8</td> <td>ever_used__8</td> <td>I don't know</td> </tr> </table> | 1 | ever_used__1         | Manual Percussion (Chest PT) | 2                        | ever_used__2 | Intrapulmonary Percussive Ventilation (IPV) | 3 | ever_used__3      | High Frequency Chest Wall Oscillation (Vest) | 4                          | ever_used__4 | Oscillating Positive Expiratory Pressure (PEP), e.g. Aerobika or Acapella | 5 | ever_used__5 | Vigorous Exercise e.g. running | 6 | ever_used__6 | Huff Coughing | 7 | ever_used__7 | Other | 8 | ever_used__8 | I don't know |
| 1  | ever_used__1                                                | Manual Percussion (Chest PT)                                                                                                          |                                                                                                                                                                                                                                                                                                                                                                                                                                                                                                                                                                                                                                                                                                                                                 |   |                      |                              |                          |              |                                             |   |                   |                                              |                            |              |                                                                           |   |              |                                |   |              |               |   |              |       |   |              |              |
| 2  | ever_used__2                                                | Intrapulmonary Percussive Ventilation (IPV)                                                                                           |                                                                                                                                                                                                                                                                                                                                                                                                                                                                                                                                                                                                                                                                                                                                                 |   |                      |                              |                          |              |                                             |   |                   |                                              |                            |              |                                                                           |   |              |                                |   |              |               |   |              |       |   |              |              |
| 3  | ever_used__3                                                | High Frequency Chest Wall Oscillation (Vest)                                                                                          |                                                                                                                                                                                                                                                                                                                                                                                                                                                                                                                                                                                                                                                                                                                                                 |   |                      |                              |                          |              |                                             |   |                   |                                              |                            |              |                                                                           |   |              |                                |   |              |               |   |              |       |   |              |              |
| 4  | ever_used__4                                                | Oscillating Positive Expiratory Pressure (PEP), e.g. Aerobika or Acapella                                                             |                                                                                                                                                                                                                                                                                                                                                                                                                                                                                                                                                                                                                                                                                                                                                 |   |                      |                              |                          |              |                                             |   |                   |                                              |                            |              |                                                                           |   |              |                                |   |              |               |   |              |       |   |              |              |
| 5  | ever_used__5                                                | Vigorous Exercise e.g. running                                                                                                        |                                                                                                                                                                                                                                                                                                                                                                                                                                                                                                                                                                                                                                                                                                                                                 |   |                      |                              |                          |              |                                             |   |                   |                                              |                            |              |                                                                           |   |              |                                |   |              |               |   |              |       |   |              |              |
| 6  | ever_used__6                                                | Huff Coughing                                                                                                                         |                                                                                                                                                                                                                                                                                                                                                                                                                                                                                                                                                                                                                                                                                                                                                 |   |                      |                              |                          |              |                                             |   |                   |                                              |                            |              |                                                                           |   |              |                                |   |              |               |   |              |       |   |              |              |
| 7  | ever_used__7                                                | Other                                                                                                                                 |                                                                                                                                                                                                                                                                                                                                                                                                                                                                                                                                                                                                                                                                                                                                                 |   |                      |                              |                          |              |                                             |   |                   |                                              |                            |              |                                                                           |   |              |                                |   |              |               |   |              |       |   |              |              |
| 8  | ever_used__8                                                | I don't know                                                                                                                          |                                                                                                                                                                                                                                                                                                                                                                                                                                                                                                                                                                                                                                                                                                                                                 |   |                      |                              |                          |              |                                             |   |                   |                                              |                            |              |                                                                           |   |              |                                |   |              |               |   |              |       |   |              |              |

|    |                                                                              |                                                                                             |                                                                                                                                                                                                                                                                                                                                                                                                                                                                                                                                                                                                                                                                                                                                                                                                                                                                        |   |                    |                              |   |                    |                                             |   |                    |                                              |   |                    |                                                                           |   |                    |                                       |   |                    |                                                     |   |                    |                                     |   |                    |                    |   |                    |              |    |                 |              |
|----|------------------------------------------------------------------------------|---------------------------------------------------------------------------------------------|------------------------------------------------------------------------------------------------------------------------------------------------------------------------------------------------------------------------------------------------------------------------------------------------------------------------------------------------------------------------------------------------------------------------------------------------------------------------------------------------------------------------------------------------------------------------------------------------------------------------------------------------------------------------------------------------------------------------------------------------------------------------------------------------------------------------------------------------------------------------|---|--------------------|------------------------------|---|--------------------|---------------------------------------------|---|--------------------|----------------------------------------------|---|--------------------|---------------------------------------------------------------------------|---|--------------------|---------------------------------------|---|--------------------|-----------------------------------------------------|---|--------------------|-------------------------------------|---|--------------------|--------------------|---|--------------------|--------------|----|-----------------|--------------|
| 16 | [clearance_forms]                                                            | Which forms of airway clearance have you used in the PAST 30 DAYS?<br>Select ALL that apply | checkbox <table border="1"> <tr> <td>1</td> <td>clearance_forms__1</td> <td>Manual Percussion (Chest PT)</td> </tr> <tr> <td>2</td> <td>clearance_forms__2</td> <td>Intrapulmonary Percussive Ventilation (IPV)</td> </tr> <tr> <td>3</td> <td>clearance_forms__3</td> <td>High Frequency Chest Wall Oscillation (Vest)</td> </tr> <tr> <td>4</td> <td>clearance_forms__4</td> <td>Oscillating Positive Expiratory Pressure (PEP), e.g. Aerobika or Acapella</td> </tr> <tr> <td>5</td> <td>clearance_forms__5</td> <td>Vigorous Exercise e.g. running</td> </tr> <tr> <td>6</td> <td>clearance_forms__6</td> <td>Huff Coughing</td> </tr> <tr> <td>7</td> <td>clearance_forms__7</td> <td>None</td> </tr> <tr> <td>8</td> <td>clearance_forms__8</td> <td>Other</td> </tr> <tr> <td>9</td> <td>clearance_forms__9</td> <td>I don't know</td> </tr> </table>           | 1 | clearance_forms__1 | Manual Percussion (Chest PT) | 2 | clearance_forms__2 | Intrapulmonary Percussive Ventilation (IPV) | 3 | clearance_forms__3 | High Frequency Chest Wall Oscillation (Vest) | 4 | clearance_forms__4 | Oscillating Positive Expiratory Pressure (PEP), e.g. Aerobika or Acapella | 5 | clearance_forms__5 | Vigorous Exercise e.g. running        | 6 | clearance_forms__6 | Huff Coughing                                       | 7 | clearance_forms__7 | None                                | 8 | clearance_forms__8 | Other              | 9 | clearance_forms__9 | I don't know |    |                 |              |
| 1  | clearance_forms__1                                                           | Manual Percussion (Chest PT)                                                                |                                                                                                                                                                                                                                                                                                                                                                                                                                                                                                                                                                                                                                                                                                                                                                                                                                                                        |   |                    |                              |   |                    |                                             |   |                    |                                              |   |                    |                                                                           |   |                    |                                       |   |                    |                                                     |   |                    |                                     |   |                    |                    |   |                    |              |    |                 |              |
| 2  | clearance_forms__2                                                           | Intrapulmonary Percussive Ventilation (IPV)                                                 |                                                                                                                                                                                                                                                                                                                                                                                                                                                                                                                                                                                                                                                                                                                                                                                                                                                                        |   |                    |                              |   |                    |                                             |   |                    |                                              |   |                    |                                                                           |   |                    |                                       |   |                    |                                                     |   |                    |                                     |   |                    |                    |   |                    |              |    |                 |              |
| 3  | clearance_forms__3                                                           | High Frequency Chest Wall Oscillation (Vest)                                                |                                                                                                                                                                                                                                                                                                                                                                                                                                                                                                                                                                                                                                                                                                                                                                                                                                                                        |   |                    |                              |   |                    |                                             |   |                    |                                              |   |                    |                                                                           |   |                    |                                       |   |                    |                                                     |   |                    |                                     |   |                    |                    |   |                    |              |    |                 |              |
| 4  | clearance_forms__4                                                           | Oscillating Positive Expiratory Pressure (PEP), e.g. Aerobika or Acapella                   |                                                                                                                                                                                                                                                                                                                                                                                                                                                                                                                                                                                                                                                                                                                                                                                                                                                                        |   |                    |                              |   |                    |                                             |   |                    |                                              |   |                    |                                                                           |   |                    |                                       |   |                    |                                                     |   |                    |                                     |   |                    |                    |   |                    |              |    |                 |              |
| 5  | clearance_forms__5                                                           | Vigorous Exercise e.g. running                                                              |                                                                                                                                                                                                                                                                                                                                                                                                                                                                                                                                                                                                                                                                                                                                                                                                                                                                        |   |                    |                              |   |                    |                                             |   |                    |                                              |   |                    |                                                                           |   |                    |                                       |   |                    |                                                     |   |                    |                                     |   |                    |                    |   |                    |              |    |                 |              |
| 6  | clearance_forms__6                                                           | Huff Coughing                                                                               |                                                                                                                                                                                                                                                                                                                                                                                                                                                                                                                                                                                                                                                                                                                                                                                                                                                                        |   |                    |                              |   |                    |                                             |   |                    |                                              |   |                    |                                                                           |   |                    |                                       |   |                    |                                                     |   |                    |                                     |   |                    |                    |   |                    |              |    |                 |              |
| 7  | clearance_forms__7                                                           | None                                                                                        |                                                                                                                                                                                                                                                                                                                                                                                                                                                                                                                                                                                                                                                                                                                                                                                                                                                                        |   |                    |                              |   |                    |                                             |   |                    |                                              |   |                    |                                                                           |   |                    |                                       |   |                    |                                                     |   |                    |                                     |   |                    |                    |   |                    |              |    |                 |              |
| 8  | clearance_forms__8                                                           | Other                                                                                       |                                                                                                                                                                                                                                                                                                                                                                                                                                                                                                                                                                                                                                                                                                                                                                                                                                                                        |   |                    |                              |   |                    |                                             |   |                    |                                              |   |                    |                                                                           |   |                    |                                       |   |                    |                                                     |   |                    |                                     |   |                    |                    |   |                    |              |    |                 |              |
| 9  | clearance_forms__9                                                           | I don't know                                                                                |                                                                                                                                                                                                                                                                                                                                                                                                                                                                                                                                                                                                                                                                                                                                                                                                                                                                        |   |                    |                              |   |                    |                                             |   |                    |                                              |   |                    |                                                                           |   |                    |                                       |   |                    |                                                     |   |                    |                                     |   |                    |                    |   |                    |              |    |                 |              |
| 17 | [why_no_like]<br>Show the field ONLY if:<br>[clearance_forms(7)] = '1'       | Why don't you perform any of these airway clearance techniques?<br>Select ALL that apply    | checkbox <table border="1"> <tr> <td>1</td> <td>why_no_like__1</td> <td>I get short of breath</td> </tr> <tr> <td>2</td> <td>why_no_like__2</td> <td>They take too much time</td> </tr> <tr> <td>3</td> <td>why_no_like__3</td> <td>They are painful</td> </tr> <tr> <td>4</td> <td>why_no_like__4</td> <td>They are uncomfortable</td> </tr> <tr> <td>5</td> <td>why_no_like__5</td> <td>They are less effective than medicine</td> </tr> <tr> <td>6</td> <td>why_no_like__6</td> <td>They do not coordinate easily with other treatments</td> </tr> <tr> <td>7</td> <td>why_no_like__7</td> <td>They are unpleasant or embarrassing</td> </tr> <tr> <td>8</td> <td>why_no_like__8</td> <td>I do not like them</td> </tr> <tr> <td>9</td> <td>why_no_like__9</td> <td>Other</td> </tr> <tr> <td>10</td> <td>why_no_like__10</td> <td>I don't know</td> </tr> </table> | 1 | why_no_like__1     | I get short of breath        | 2 | why_no_like__2     | They take too much time                     | 3 | why_no_like__3     | They are painful                             | 4 | why_no_like__4     | They are uncomfortable                                                    | 5 | why_no_like__5     | They are less effective than medicine | 6 | why_no_like__6     | They do not coordinate easily with other treatments | 7 | why_no_like__7     | They are unpleasant or embarrassing | 8 | why_no_like__8     | I do not like them | 9 | why_no_like__9     | Other        | 10 | why_no_like__10 | I don't know |
| 1  | why_no_like__1                                                               | I get short of breath                                                                       |                                                                                                                                                                                                                                                                                                                                                                                                                                                                                                                                                                                                                                                                                                                                                                                                                                                                        |   |                    |                              |   |                    |                                             |   |                    |                                              |   |                    |                                                                           |   |                    |                                       |   |                    |                                                     |   |                    |                                     |   |                    |                    |   |                    |              |    |                 |              |
| 2  | why_no_like__2                                                               | They take too much time                                                                     |                                                                                                                                                                                                                                                                                                                                                                                                                                                                                                                                                                                                                                                                                                                                                                                                                                                                        |   |                    |                              |   |                    |                                             |   |                    |                                              |   |                    |                                                                           |   |                    |                                       |   |                    |                                                     |   |                    |                                     |   |                    |                    |   |                    |              |    |                 |              |
| 3  | why_no_like__3                                                               | They are painful                                                                            |                                                                                                                                                                                                                                                                                                                                                                                                                                                                                                                                                                                                                                                                                                                                                                                                                                                                        |   |                    |                              |   |                    |                                             |   |                    |                                              |   |                    |                                                                           |   |                    |                                       |   |                    |                                                     |   |                    |                                     |   |                    |                    |   |                    |              |    |                 |              |
| 4  | why_no_like__4                                                               | They are uncomfortable                                                                      |                                                                                                                                                                                                                                                                                                                                                                                                                                                                                                                                                                                                                                                                                                                                                                                                                                                                        |   |                    |                              |   |                    |                                             |   |                    |                                              |   |                    |                                                                           |   |                    |                                       |   |                    |                                                     |   |                    |                                     |   |                    |                    |   |                    |              |    |                 |              |
| 5  | why_no_like__5                                                               | They are less effective than medicine                                                       |                                                                                                                                                                                                                                                                                                                                                                                                                                                                                                                                                                                                                                                                                                                                                                                                                                                                        |   |                    |                              |   |                    |                                             |   |                    |                                              |   |                    |                                                                           |   |                    |                                       |   |                    |                                                     |   |                    |                                     |   |                    |                    |   |                    |              |    |                 |              |
| 6  | why_no_like__6                                                               | They do not coordinate easily with other treatments                                         |                                                                                                                                                                                                                                                                                                                                                                                                                                                                                                                                                                                                                                                                                                                                                                                                                                                                        |   |                    |                              |   |                    |                                             |   |                    |                                              |   |                    |                                                                           |   |                    |                                       |   |                    |                                                     |   |                    |                                     |   |                    |                    |   |                    |              |    |                 |              |
| 7  | why_no_like__7                                                               | They are unpleasant or embarrassing                                                         |                                                                                                                                                                                                                                                                                                                                                                                                                                                                                                                                                                                                                                                                                                                                                                                                                                                                        |   |                    |                              |   |                    |                                             |   |                    |                                              |   |                    |                                                                           |   |                    |                                       |   |                    |                                                     |   |                    |                                     |   |                    |                    |   |                    |              |    |                 |              |
| 8  | why_no_like__8                                                               | I do not like them                                                                          |                                                                                                                                                                                                                                                                                                                                                                                                                                                                                                                                                                                                                                                                                                                                                                                                                                                                        |   |                    |                              |   |                    |                                             |   |                    |                                              |   |                    |                                                                           |   |                    |                                       |   |                    |                                                     |   |                    |                                     |   |                    |                    |   |                    |              |    |                 |              |
| 9  | why_no_like__9                                                               | Other                                                                                       |                                                                                                                                                                                                                                                                                                                                                                                                                                                                                                                                                                                                                                                                                                                                                                                                                                                                        |   |                    |                              |   |                    |                                             |   |                    |                                              |   |                    |                                                                           |   |                    |                                       |   |                    |                                                     |   |                    |                                     |   |                    |                    |   |                    |              |    |                 |              |
| 10 | why_no_like__10                                                              | I don't know                                                                                |                                                                                                                                                                                                                                                                                                                                                                                                                                                                                                                                                                                                                                                                                                                                                                                                                                                                        |   |                    |                              |   |                    |                                             |   |                    |                                              |   |                    |                                                                           |   |                    |                                       |   |                    |                                                     |   |                    |                                     |   |                    |                    |   |                    |              |    |                 |              |
| 18 | [chest_pt_like]<br>Show the field ONLY if:<br>[ever_used(1)] = '1'           | What do you LIKE about Manual Percussion (Chest PT)?<br>Select ALL that apply               | checkbox <table border="1"> <tr> <td>1</td> <td>chest_pt_like__1</td> <td>It takes little time</td> </tr> <tr> <td>2</td> <td>chest_pt_like__2</td> <td>It is comfortable</td> </tr> <tr> <td>3</td> <td>chest_pt_like__3</td> <td>It works well with my other treatments</td> </tr> <tr> <td>4</td> <td>chest_pt_like__4</td> <td>It is more effective than other forms of airway clearance</td> </tr> <tr> <td>5</td> <td>chest_pt_like__5</td> <td>It feels good or is healthy</td> </tr> <tr> <td>6</td> <td>chest_pt_like__6</td> <td>Nothing</td> </tr> <tr> <td>7</td> <td>chest_pt_like__7</td> <td>Other</td> </tr> <tr> <td>8</td> <td>chest_pt_like__8</td> <td>I don't know</td> </tr> </table>                                                                                                                                                            | 1 | chest_pt_like__1   | It takes little time         | 2 | chest_pt_like__2   | It is comfortable                           | 3 | chest_pt_like__3   | It works well with my other treatments       | 4 | chest_pt_like__4   | It is more effective than other forms of airway clearance                 | 5 | chest_pt_like__5   | It feels good or is healthy           | 6 | chest_pt_like__6   | Nothing                                             | 7 | chest_pt_like__7   | Other                               | 8 | chest_pt_like__8   | I don't know       |   |                    |              |    |                 |              |
| 1  | chest_pt_like__1                                                             | It takes little time                                                                        |                                                                                                                                                                                                                                                                                                                                                                                                                                                                                                                                                                                                                                                                                                                                                                                                                                                                        |   |                    |                              |   |                    |                                             |   |                    |                                              |   |                    |                                                                           |   |                    |                                       |   |                    |                                                     |   |                    |                                     |   |                    |                    |   |                    |              |    |                 |              |
| 2  | chest_pt_like__2                                                             | It is comfortable                                                                           |                                                                                                                                                                                                                                                                                                                                                                                                                                                                                                                                                                                                                                                                                                                                                                                                                                                                        |   |                    |                              |   |                    |                                             |   |                    |                                              |   |                    |                                                                           |   |                    |                                       |   |                    |                                                     |   |                    |                                     |   |                    |                    |   |                    |              |    |                 |              |
| 3  | chest_pt_like__3                                                             | It works well with my other treatments                                                      |                                                                                                                                                                                                                                                                                                                                                                                                                                                                                                                                                                                                                                                                                                                                                                                                                                                                        |   |                    |                              |   |                    |                                             |   |                    |                                              |   |                    |                                                                           |   |                    |                                       |   |                    |                                                     |   |                    |                                     |   |                    |                    |   |                    |              |    |                 |              |
| 4  | chest_pt_like__4                                                             | It is more effective than other forms of airway clearance                                   |                                                                                                                                                                                                                                                                                                                                                                                                                                                                                                                                                                                                                                                                                                                                                                                                                                                                        |   |                    |                              |   |                    |                                             |   |                    |                                              |   |                    |                                                                           |   |                    |                                       |   |                    |                                                     |   |                    |                                     |   |                    |                    |   |                    |              |    |                 |              |
| 5  | chest_pt_like__5                                                             | It feels good or is healthy                                                                 |                                                                                                                                                                                                                                                                                                                                                                                                                                                                                                                                                                                                                                                                                                                                                                                                                                                                        |   |                    |                              |   |                    |                                             |   |                    |                                              |   |                    |                                                                           |   |                    |                                       |   |                    |                                                     |   |                    |                                     |   |                    |                    |   |                    |              |    |                 |              |
| 6  | chest_pt_like__6                                                             | Nothing                                                                                     |                                                                                                                                                                                                                                                                                                                                                                                                                                                                                                                                                                                                                                                                                                                                                                                                                                                                        |   |                    |                              |   |                    |                                             |   |                    |                                              |   |                    |                                                                           |   |                    |                                       |   |                    |                                                     |   |                    |                                     |   |                    |                    |   |                    |              |    |                 |              |
| 7  | chest_pt_like__7                                                             | Other                                                                                       |                                                                                                                                                                                                                                                                                                                                                                                                                                                                                                                                                                                                                                                                                                                                                                                                                                                                        |   |                    |                              |   |                    |                                             |   |                    |                                              |   |                    |                                                                           |   |                    |                                       |   |                    |                                                     |   |                    |                                     |   |                    |                    |   |                    |              |    |                 |              |
| 8  | chest_pt_like__8                                                             | I don't know                                                                                |                                                                                                                                                                                                                                                                                                                                                                                                                                                                                                                                                                                                                                                                                                                                                                                                                                                                        |   |                    |                              |   |                    |                                             |   |                    |                                              |   |                    |                                                                           |   |                    |                                       |   |                    |                                                     |   |                    |                                     |   |                    |                    |   |                    |              |    |                 |              |
| 19 | [other_like_chest_pt]<br>Show the field ONLY if:<br>[chest_pt_like(7)] = '1' | Please explain what you LIKE about Manual Percussion (Chest PT)                             | notes                                                                                                                                                                                                                                                                                                                                                                                                                                                                                                                                                                                                                                                                                                                                                                                                                                                                  |   |                    |                              |   |                    |                                             |   |                    |                                              |   |                    |                                                                           |   |                    |                                       |   |                    |                                                     |   |                    |                                     |   |                    |                    |   |                    |              |    |                 |              |

|    |                                                                               |                                                                                                                            |                                                                                                                                                                                                                                                                                                                                                                                                                                                                                                                                                                                                                                                                             |   |              |                      |   |              |                   |   |              |                                        |   |              |                                                           |   |              |                             |   |              |         |   |              |       |   |              |              |
|----|-------------------------------------------------------------------------------|----------------------------------------------------------------------------------------------------------------------------|-----------------------------------------------------------------------------------------------------------------------------------------------------------------------------------------------------------------------------------------------------------------------------------------------------------------------------------------------------------------------------------------------------------------------------------------------------------------------------------------------------------------------------------------------------------------------------------------------------------------------------------------------------------------------------|---|--------------|----------------------|---|--------------|-------------------|---|--------------|----------------------------------------|---|--------------|-----------------------------------------------------------|---|--------------|-----------------------------|---|--------------|---------|---|--------------|-------|---|--------------|--------------|
| 20 | [ <b>ipv_like</b> ]<br>Show the field ONLY if:<br>[ever_used(2)] = '1'        | What do you LIKE about Intrapulmonary Percussive Ventilation (IPV)?<br>Select ALL that apply                               | checkbox <table border="1"> <tr> <td>1</td> <td>ipv_like__1</td> <td>It takes little time</td> </tr> <tr> <td>2</td> <td>ipv_like__2</td> <td>It is comfortable</td> </tr> <tr> <td>3</td> <td>ipv_like__3</td> <td>It works well with my other treatments</td> </tr> <tr> <td>4</td> <td>ipv_like__4</td> <td>It is more effective than other forms of airway clearance</td> </tr> <tr> <td>5</td> <td>ipv_like__5</td> <td>It feels good or is healthy</td> </tr> <tr> <td>6</td> <td>ipv_like__6</td> <td>Nothing</td> </tr> <tr> <td>7</td> <td>ipv_like__7</td> <td>Other</td> </tr> <tr> <td>8</td> <td>ipv_like__8</td> <td>I don't know</td> </tr> </table>         | 1 | ipv_like__1  | It takes little time | 2 | ipv_like__2  | It is comfortable | 3 | ipv_like__3  | It works well with my other treatments | 4 | ipv_like__4  | It is more effective than other forms of airway clearance | 5 | ipv_like__5  | It feels good or is healthy | 6 | ipv_like__6  | Nothing | 7 | ipv_like__7  | Other | 8 | ipv_like__8  | I don't know |
| 1  | ipv_like__1                                                                   | It takes little time                                                                                                       |                                                                                                                                                                                                                                                                                                                                                                                                                                                                                                                                                                                                                                                                             |   |              |                      |   |              |                   |   |              |                                        |   |              |                                                           |   |              |                             |   |              |         |   |              |       |   |              |              |
| 2  | ipv_like__2                                                                   | It is comfortable                                                                                                          |                                                                                                                                                                                                                                                                                                                                                                                                                                                                                                                                                                                                                                                                             |   |              |                      |   |              |                   |   |              |                                        |   |              |                                                           |   |              |                             |   |              |         |   |              |       |   |              |              |
| 3  | ipv_like__3                                                                   | It works well with my other treatments                                                                                     |                                                                                                                                                                                                                                                                                                                                                                                                                                                                                                                                                                                                                                                                             |   |              |                      |   |              |                   |   |              |                                        |   |              |                                                           |   |              |                             |   |              |         |   |              |       |   |              |              |
| 4  | ipv_like__4                                                                   | It is more effective than other forms of airway clearance                                                                  |                                                                                                                                                                                                                                                                                                                                                                                                                                                                                                                                                                                                                                                                             |   |              |                      |   |              |                   |   |              |                                        |   |              |                                                           |   |              |                             |   |              |         |   |              |       |   |              |              |
| 5  | ipv_like__5                                                                   | It feels good or is healthy                                                                                                |                                                                                                                                                                                                                                                                                                                                                                                                                                                                                                                                                                                                                                                                             |   |              |                      |   |              |                   |   |              |                                        |   |              |                                                           |   |              |                             |   |              |         |   |              |       |   |              |              |
| 6  | ipv_like__6                                                                   | Nothing                                                                                                                    |                                                                                                                                                                                                                                                                                                                                                                                                                                                                                                                                                                                                                                                                             |   |              |                      |   |              |                   |   |              |                                        |   |              |                                                           |   |              |                             |   |              |         |   |              |       |   |              |              |
| 7  | ipv_like__7                                                                   | Other                                                                                                                      |                                                                                                                                                                                                                                                                                                                                                                                                                                                                                                                                                                                                                                                                             |   |              |                      |   |              |                   |   |              |                                        |   |              |                                                           |   |              |                             |   |              |         |   |              |       |   |              |              |
| 8  | ipv_like__8                                                                   | I don't know                                                                                                               |                                                                                                                                                                                                                                                                                                                                                                                                                                                                                                                                                                                                                                                                             |   |              |                      |   |              |                   |   |              |                                        |   |              |                                                           |   |              |                             |   |              |         |   |              |       |   |              |              |
| 21 | [ <b>other_like_ipv</b> ]<br>Show the field ONLY if:<br>[ipv_like(7)] = '1'   | Please explain what you LIKE about Intrapulmonary Percussive Ventilation (IPV)                                             | notes                                                                                                                                                                                                                                                                                                                                                                                                                                                                                                                                                                                                                                                                       |   |              |                      |   |              |                   |   |              |                                        |   |              |                                                           |   |              |                             |   |              |         |   |              |       |   |              |              |
| 22 | [ <b>vest_like</b> ]<br>Show the field ONLY if:<br>[ever_used(3)] = '1'       | What do you LIKE about High Frequency Chest Wall Oscillation (Vest)?<br>Select ALL that apply                              | checkbox <table border="1"> <tr> <td>1</td> <td>vest_like__1</td> <td>It takes little time</td> </tr> <tr> <td>2</td> <td>vest_like__2</td> <td>It is comfortable</td> </tr> <tr> <td>3</td> <td>vest_like__3</td> <td>It works well with my other treatments</td> </tr> <tr> <td>4</td> <td>vest_like__4</td> <td>It is more effective than other forms of airway clearance</td> </tr> <tr> <td>5</td> <td>vest_like__5</td> <td>It feels good or is healthy</td> </tr> <tr> <td>6</td> <td>vest_like__6</td> <td>Nothing</td> </tr> <tr> <td>7</td> <td>vest_like__7</td> <td>Other</td> </tr> <tr> <td>8</td> <td>vest_like__8</td> <td>I don't know</td> </tr> </table> | 1 | vest_like__1 | It takes little time | 2 | vest_like__2 | It is comfortable | 3 | vest_like__3 | It works well with my other treatments | 4 | vest_like__4 | It is more effective than other forms of airway clearance | 5 | vest_like__5 | It feels good or is healthy | 6 | vest_like__6 | Nothing | 7 | vest_like__7 | Other | 8 | vest_like__8 | I don't know |
| 1  | vest_like__1                                                                  | It takes little time                                                                                                       |                                                                                                                                                                                                                                                                                                                                                                                                                                                                                                                                                                                                                                                                             |   |              |                      |   |              |                   |   |              |                                        |   |              |                                                           |   |              |                             |   |              |         |   |              |       |   |              |              |
| 2  | vest_like__2                                                                  | It is comfortable                                                                                                          |                                                                                                                                                                                                                                                                                                                                                                                                                                                                                                                                                                                                                                                                             |   |              |                      |   |              |                   |   |              |                                        |   |              |                                                           |   |              |                             |   |              |         |   |              |       |   |              |              |
| 3  | vest_like__3                                                                  | It works well with my other treatments                                                                                     |                                                                                                                                                                                                                                                                                                                                                                                                                                                                                                                                                                                                                                                                             |   |              |                      |   |              |                   |   |              |                                        |   |              |                                                           |   |              |                             |   |              |         |   |              |       |   |              |              |
| 4  | vest_like__4                                                                  | It is more effective than other forms of airway clearance                                                                  |                                                                                                                                                                                                                                                                                                                                                                                                                                                                                                                                                                                                                                                                             |   |              |                      |   |              |                   |   |              |                                        |   |              |                                                           |   |              |                             |   |              |         |   |              |       |   |              |              |
| 5  | vest_like__5                                                                  | It feels good or is healthy                                                                                                |                                                                                                                                                                                                                                                                                                                                                                                                                                                                                                                                                                                                                                                                             |   |              |                      |   |              |                   |   |              |                                        |   |              |                                                           |   |              |                             |   |              |         |   |              |       |   |              |              |
| 6  | vest_like__6                                                                  | Nothing                                                                                                                    |                                                                                                                                                                                                                                                                                                                                                                                                                                                                                                                                                                                                                                                                             |   |              |                      |   |              |                   |   |              |                                        |   |              |                                                           |   |              |                             |   |              |         |   |              |       |   |              |              |
| 7  | vest_like__7                                                                  | Other                                                                                                                      |                                                                                                                                                                                                                                                                                                                                                                                                                                                                                                                                                                                                                                                                             |   |              |                      |   |              |                   |   |              |                                        |   |              |                                                           |   |              |                             |   |              |         |   |              |       |   |              |              |
| 8  | vest_like__8                                                                  | I don't know                                                                                                               |                                                                                                                                                                                                                                                                                                                                                                                                                                                                                                                                                                                                                                                                             |   |              |                      |   |              |                   |   |              |                                        |   |              |                                                           |   |              |                             |   |              |         |   |              |       |   |              |              |
| 23 | [ <b>other_like_vest</b> ]<br>Show the field ONLY if:<br>[vest_like(7)] = '1' | Please explain what you LIKE about High Frequency Chest Wall Oscillation (Vest)                                            | notes                                                                                                                                                                                                                                                                                                                                                                                                                                                                                                                                                                                                                                                                       |   |              |                      |   |              |                   |   |              |                                        |   |              |                                                           |   |              |                             |   |              |         |   |              |       |   |              |              |
| 24 | [ <b>pep_like</b> ]<br>Show the field ONLY if:<br>[ever_used(4)] = '1'        | What do you LIKE about Oscillating Positive Expiratory Pressure (PEP), e.g. Aerobika or Acapella?<br>Select ALL that apply | checkbox <table border="1"> <tr> <td>1</td> <td>pep_like__1</td> <td>It takes little time</td> </tr> <tr> <td>2</td> <td>pep_like__2</td> <td>It is comfortable</td> </tr> <tr> <td>3</td> <td>pep_like__3</td> <td>It works well with my other treatments</td> </tr> <tr> <td>4</td> <td>pep_like__4</td> <td>It is more effective than other forms of airway clearance</td> </tr> <tr> <td>5</td> <td>pep_like__5</td> <td>It feels good or is healthy</td> </tr> <tr> <td>6</td> <td>pep_like__6</td> <td>Nothing</td> </tr> <tr> <td>7</td> <td>pep_like__7</td> <td>Other</td> </tr> <tr> <td>8</td> <td>pep_like__8</td> <td>I don't know</td> </tr> </table>         | 1 | pep_like__1  | It takes little time | 2 | pep_like__2  | It is comfortable | 3 | pep_like__3  | It works well with my other treatments | 4 | pep_like__4  | It is more effective than other forms of airway clearance | 5 | pep_like__5  | It feels good or is healthy | 6 | pep_like__6  | Nothing | 7 | pep_like__7  | Other | 8 | pep_like__8  | I don't know |
| 1  | pep_like__1                                                                   | It takes little time                                                                                                       |                                                                                                                                                                                                                                                                                                                                                                                                                                                                                                                                                                                                                                                                             |   |              |                      |   |              |                   |   |              |                                        |   |              |                                                           |   |              |                             |   |              |         |   |              |       |   |              |              |
| 2  | pep_like__2                                                                   | It is comfortable                                                                                                          |                                                                                                                                                                                                                                                                                                                                                                                                                                                                                                                                                                                                                                                                             |   |              |                      |   |              |                   |   |              |                                        |   |              |                                                           |   |              |                             |   |              |         |   |              |       |   |              |              |
| 3  | pep_like__3                                                                   | It works well with my other treatments                                                                                     |                                                                                                                                                                                                                                                                                                                                                                                                                                                                                                                                                                                                                                                                             |   |              |                      |   |              |                   |   |              |                                        |   |              |                                                           |   |              |                             |   |              |         |   |              |       |   |              |              |
| 4  | pep_like__4                                                                   | It is more effective than other forms of airway clearance                                                                  |                                                                                                                                                                                                                                                                                                                                                                                                                                                                                                                                                                                                                                                                             |   |              |                      |   |              |                   |   |              |                                        |   |              |                                                           |   |              |                             |   |              |         |   |              |       |   |              |              |
| 5  | pep_like__5                                                                   | It feels good or is healthy                                                                                                |                                                                                                                                                                                                                                                                                                                                                                                                                                                                                                                                                                                                                                                                             |   |              |                      |   |              |                   |   |              |                                        |   |              |                                                           |   |              |                             |   |              |         |   |              |       |   |              |              |
| 6  | pep_like__6                                                                   | Nothing                                                                                                                    |                                                                                                                                                                                                                                                                                                                                                                                                                                                                                                                                                                                                                                                                             |   |              |                      |   |              |                   |   |              |                                        |   |              |                                                           |   |              |                             |   |              |         |   |              |       |   |              |              |
| 7  | pep_like__7                                                                   | Other                                                                                                                      |                                                                                                                                                                                                                                                                                                                                                                                                                                                                                                                                                                                                                                                                             |   |              |                      |   |              |                   |   |              |                                        |   |              |                                                           |   |              |                             |   |              |         |   |              |       |   |              |              |
| 8  | pep_like__8                                                                   | I don't know                                                                                                               |                                                                                                                                                                                                                                                                                                                                                                                                                                                                                                                                                                                                                                                                             |   |              |                      |   |              |                   |   |              |                                        |   |              |                                                           |   |              |                             |   |              |         |   |              |       |   |              |              |
| 25 | [ <b>other_like_pep</b> ]<br>Show the field ONLY if:<br>[pep_like(7)] = '1'   | Please explain what you LIKE about Oscillating Positive Expiratory Pressure (PEP), e.g. Aerobika or Acapella               | notes                                                                                                                                                                                                                                                                                                                                                                                                                                                                                                                                                                                                                                                                       |   |              |                      |   |              |                   |   |              |                                        |   |              |                                                           |   |              |                             |   |              |         |   |              |       |   |              |              |

|    |                                                                                                                                              |                                                                                  |                                                                                                                                                                                                                                                                                                                                                                                                                                                                                                                                                                                                                                                                                                                                                                                                       |   |                     |                       |   |                     |                   |   |                     |                                        |   |                     |                                                           |   |                     |                                                           |   |                     |                                                |   |                     |                                  |   |                     |              |   |                     |              |
|----|----------------------------------------------------------------------------------------------------------------------------------------------|----------------------------------------------------------------------------------|-------------------------------------------------------------------------------------------------------------------------------------------------------------------------------------------------------------------------------------------------------------------------------------------------------------------------------------------------------------------------------------------------------------------------------------------------------------------------------------------------------------------------------------------------------------------------------------------------------------------------------------------------------------------------------------------------------------------------------------------------------------------------------------------------------|---|---------------------|-----------------------|---|---------------------|-------------------|---|---------------------|----------------------------------------|---|---------------------|-----------------------------------------------------------|---|---------------------|-----------------------------------------------------------|---|---------------------|------------------------------------------------|---|---------------------|----------------------------------|---|---------------------|--------------|---|---------------------|--------------|
| 26 | [exercise_like]<br>Show the field ONLY if:<br>[ever_used(5)] = '1'                                                                           | What do you LIKE about Vigorous Aerobic Exercise?<br>Select ALL that apply       | checkbox <table border="1"> <tr><td>1</td><td>exercise_like__1</td><td>It takes little time</td></tr> <tr><td>2</td><td>exercise_like__2</td><td>It is comfortable</td></tr> <tr><td>3</td><td>exercise_like__3</td><td>It works well with my other treatments</td></tr> <tr><td>4</td><td>exercise_like__4</td><td>It is more effective than other forms of airway clearance</td></tr> <tr><td>5</td><td>exercise_like__5</td><td>It feels good or is healthy</td></tr> <tr><td>6</td><td>exercise_like__6</td><td>Nothing</td></tr> <tr><td>7</td><td>exercise_like__7</td><td>Other</td></tr> <tr><td>8</td><td>exercise_like__8</td><td>I don't know</td></tr> </table>                                                                                                                           | 1 | exercise_like__1    | It takes little time  | 2 | exercise_like__2    | It is comfortable | 3 | exercise_like__3    | It works well with my other treatments | 4 | exercise_like__4    | It is more effective than other forms of airway clearance | 5 | exercise_like__5    | It feels good or is healthy                               | 6 | exercise_like__6    | Nothing                                        | 7 | exercise_like__7    | Other                            | 8 | exercise_like__8    | I don't know |   |                     |              |
| 1  | exercise_like__1                                                                                                                             | It takes little time                                                             |                                                                                                                                                                                                                                                                                                                                                                                                                                                                                                                                                                                                                                                                                                                                                                                                       |   |                     |                       |   |                     |                   |   |                     |                                        |   |                     |                                                           |   |                     |                                                           |   |                     |                                                |   |                     |                                  |   |                     |              |   |                     |              |
| 2  | exercise_like__2                                                                                                                             | It is comfortable                                                                |                                                                                                                                                                                                                                                                                                                                                                                                                                                                                                                                                                                                                                                                                                                                                                                                       |   |                     |                       |   |                     |                   |   |                     |                                        |   |                     |                                                           |   |                     |                                                           |   |                     |                                                |   |                     |                                  |   |                     |              |   |                     |              |
| 3  | exercise_like__3                                                                                                                             | It works well with my other treatments                                           |                                                                                                                                                                                                                                                                                                                                                                                                                                                                                                                                                                                                                                                                                                                                                                                                       |   |                     |                       |   |                     |                   |   |                     |                                        |   |                     |                                                           |   |                     |                                                           |   |                     |                                                |   |                     |                                  |   |                     |              |   |                     |              |
| 4  | exercise_like__4                                                                                                                             | It is more effective than other forms of airway clearance                        |                                                                                                                                                                                                                                                                                                                                                                                                                                                                                                                                                                                                                                                                                                                                                                                                       |   |                     |                       |   |                     |                   |   |                     |                                        |   |                     |                                                           |   |                     |                                                           |   |                     |                                                |   |                     |                                  |   |                     |              |   |                     |              |
| 5  | exercise_like__5                                                                                                                             | It feels good or is healthy                                                      |                                                                                                                                                                                                                                                                                                                                                                                                                                                                                                                                                                                                                                                                                                                                                                                                       |   |                     |                       |   |                     |                   |   |                     |                                        |   |                     |                                                           |   |                     |                                                           |   |                     |                                                |   |                     |                                  |   |                     |              |   |                     |              |
| 6  | exercise_like__6                                                                                                                             | Nothing                                                                          |                                                                                                                                                                                                                                                                                                                                                                                                                                                                                                                                                                                                                                                                                                                                                                                                       |   |                     |                       |   |                     |                   |   |                     |                                        |   |                     |                                                           |   |                     |                                                           |   |                     |                                                |   |                     |                                  |   |                     |              |   |                     |              |
| 7  | exercise_like__7                                                                                                                             | Other                                                                            |                                                                                                                                                                                                                                                                                                                                                                                                                                                                                                                                                                                                                                                                                                                                                                                                       |   |                     |                       |   |                     |                   |   |                     |                                        |   |                     |                                                           |   |                     |                                                           |   |                     |                                                |   |                     |                                  |   |                     |              |   |                     |              |
| 8  | exercise_like__8                                                                                                                             | I don't know                                                                     |                                                                                                                                                                                                                                                                                                                                                                                                                                                                                                                                                                                                                                                                                                                                                                                                       |   |                     |                       |   |                     |                   |   |                     |                                        |   |                     |                                                           |   |                     |                                                           |   |                     |                                                |   |                     |                                  |   |                     |              |   |                     |              |
| 27 | [other_like_exercise]<br>Show the field ONLY if:<br>[exercise_like(7)] = '1'                                                                 | Please explain what you LIKE about Vigorous Aerobic Exercise                     | notes                                                                                                                                                                                                                                                                                                                                                                                                                                                                                                                                                                                                                                                                                                                                                                                                 |   |                     |                       |   |                     |                   |   |                     |                                        |   |                     |                                                           |   |                     |                                                           |   |                     |                                                |   |                     |                                  |   |                     |              |   |                     |              |
| 28 | [huff_cough_like]<br>Show the field ONLY if:<br>[ever_used(6)] = '1'                                                                         | What do you LIKE about Huff Coughing?<br>Select ALL that apply                   | checkbox <table border="1"> <tr><td>1</td><td>huff_cough_like__1</td><td>It takes little time</td></tr> <tr><td>2</td><td>huff_cough_like__2</td><td>It is comfortable</td></tr> <tr><td>3</td><td>huff_cough_like__3</td><td>It works well with my other treatments</td></tr> <tr><td>4</td><td>huff_cough_like__4</td><td>It is more effective than other forms of airway clearance</td></tr> <tr><td>5</td><td>huff_cough_like__5</td><td>It feels good or is healthy</td></tr> <tr><td>6</td><td>huff_cough_like__6</td><td>Nothing</td></tr> <tr><td>7</td><td>huff_cough_like__7</td><td>Other</td></tr> <tr><td>8</td><td>huff_cough_like__8</td><td>I don't know</td></tr> </table>                                                                                                           | 1 | huff_cough_like__1  | It takes little time  | 2 | huff_cough_like__2  | It is comfortable | 3 | huff_cough_like__3  | It works well with my other treatments | 4 | huff_cough_like__4  | It is more effective than other forms of airway clearance | 5 | huff_cough_like__5  | It feels good or is healthy                               | 6 | huff_cough_like__6  | Nothing                                        | 7 | huff_cough_like__7  | Other                            | 8 | huff_cough_like__8  | I don't know |   |                     |              |
| 1  | huff_cough_like__1                                                                                                                           | It takes little time                                                             |                                                                                                                                                                                                                                                                                                                                                                                                                                                                                                                                                                                                                                                                                                                                                                                                       |   |                     |                       |   |                     |                   |   |                     |                                        |   |                     |                                                           |   |                     |                                                           |   |                     |                                                |   |                     |                                  |   |                     |              |   |                     |              |
| 2  | huff_cough_like__2                                                                                                                           | It is comfortable                                                                |                                                                                                                                                                                                                                                                                                                                                                                                                                                                                                                                                                                                                                                                                                                                                                                                       |   |                     |                       |   |                     |                   |   |                     |                                        |   |                     |                                                           |   |                     |                                                           |   |                     |                                                |   |                     |                                  |   |                     |              |   |                     |              |
| 3  | huff_cough_like__3                                                                                                                           | It works well with my other treatments                                           |                                                                                                                                                                                                                                                                                                                                                                                                                                                                                                                                                                                                                                                                                                                                                                                                       |   |                     |                       |   |                     |                   |   |                     |                                        |   |                     |                                                           |   |                     |                                                           |   |                     |                                                |   |                     |                                  |   |                     |              |   |                     |              |
| 4  | huff_cough_like__4                                                                                                                           | It is more effective than other forms of airway clearance                        |                                                                                                                                                                                                                                                                                                                                                                                                                                                                                                                                                                                                                                                                                                                                                                                                       |   |                     |                       |   |                     |                   |   |                     |                                        |   |                     |                                                           |   |                     |                                                           |   |                     |                                                |   |                     |                                  |   |                     |              |   |                     |              |
| 5  | huff_cough_like__5                                                                                                                           | It feels good or is healthy                                                      |                                                                                                                                                                                                                                                                                                                                                                                                                                                                                                                                                                                                                                                                                                                                                                                                       |   |                     |                       |   |                     |                   |   |                     |                                        |   |                     |                                                           |   |                     |                                                           |   |                     |                                                |   |                     |                                  |   |                     |              |   |                     |              |
| 6  | huff_cough_like__6                                                                                                                           | Nothing                                                                          |                                                                                                                                                                                                                                                                                                                                                                                                                                                                                                                                                                                                                                                                                                                                                                                                       |   |                     |                       |   |                     |                   |   |                     |                                        |   |                     |                                                           |   |                     |                                                           |   |                     |                                                |   |                     |                                  |   |                     |              |   |                     |              |
| 7  | huff_cough_like__7                                                                                                                           | Other                                                                            |                                                                                                                                                                                                                                                                                                                                                                                                                                                                                                                                                                                                                                                                                                                                                                                                       |   |                     |                       |   |                     |                   |   |                     |                                        |   |                     |                                                           |   |                     |                                                           |   |                     |                                                |   |                     |                                  |   |                     |              |   |                     |              |
| 8  | huff_cough_like__8                                                                                                                           | I don't know                                                                     |                                                                                                                                                                                                                                                                                                                                                                                                                                                                                                                                                                                                                                                                                                                                                                                                       |   |                     |                       |   |                     |                   |   |                     |                                        |   |                     |                                                           |   |                     |                                                           |   |                     |                                                |   |                     |                                  |   |                     |              |   |                     |              |
| 29 | [other_like_huff_cough]<br>Show the field ONLY if:<br>[huff_cough_like(7)] = '1'                                                             | Please explain what you LIKE about Huff Coughing                                 | notes                                                                                                                                                                                                                                                                                                                                                                                                                                                                                                                                                                                                                                                                                                                                                                                                 |   |                     |                       |   |                     |                   |   |                     |                                        |   |                     |                                                           |   |                     |                                                           |   |                     |                                                |   |                     |                                  |   |                     |              |   |                     |              |
| 30 | [chest_pt_dislike]<br>Show the field ONLY if:<br>[ever_used(1)] = '1'                                                                        | What do you DISLIKE about Manual Percussion (Chest PT)?<br>Select ALL that apply | checkbox <table border="1"> <tr><td>1</td><td>chest_pt_dislike__1</td><td>I get short of breath</td></tr> <tr><td>2</td><td>chest_pt_dislike__2</td><td>It takes too long</td></tr> <tr><td>3</td><td>chest_pt_dislike__3</td><td>It is painful</td></tr> <tr><td>4</td><td>chest_pt_dislike__4</td><td>It is uncomfortable</td></tr> <tr><td>5</td><td>chest_pt_dislike__5</td><td>It is less effective than other forms of airway clearance</td></tr> <tr><td>6</td><td>chest_pt_dislike__6</td><td>It does not work well with my other treatments</td></tr> <tr><td>7</td><td>chest_pt_dislike__7</td><td>It is unpleasant or embarrassing</td></tr> <tr><td>8</td><td>chest_pt_dislike__8</td><td>Nothing</td></tr> <tr><td>9</td><td>chest_pt_dislike__9</td><td>I don't know</td></tr> </table> | 1 | chest_pt_dislike__1 | I get short of breath | 2 | chest_pt_dislike__2 | It takes too long | 3 | chest_pt_dislike__3 | It is painful                          | 4 | chest_pt_dislike__4 | It is uncomfortable                                       | 5 | chest_pt_dislike__5 | It is less effective than other forms of airway clearance | 6 | chest_pt_dislike__6 | It does not work well with my other treatments | 7 | chest_pt_dislike__7 | It is unpleasant or embarrassing | 8 | chest_pt_dislike__8 | Nothing      | 9 | chest_pt_dislike__9 | I don't know |
| 1  | chest_pt_dislike__1                                                                                                                          | I get short of breath                                                            |                                                                                                                                                                                                                                                                                                                                                                                                                                                                                                                                                                                                                                                                                                                                                                                                       |   |                     |                       |   |                     |                   |   |                     |                                        |   |                     |                                                           |   |                     |                                                           |   |                     |                                                |   |                     |                                  |   |                     |              |   |                     |              |
| 2  | chest_pt_dislike__2                                                                                                                          | It takes too long                                                                |                                                                                                                                                                                                                                                                                                                                                                                                                                                                                                                                                                                                                                                                                                                                                                                                       |   |                     |                       |   |                     |                   |   |                     |                                        |   |                     |                                                           |   |                     |                                                           |   |                     |                                                |   |                     |                                  |   |                     |              |   |                     |              |
| 3  | chest_pt_dislike__3                                                                                                                          | It is painful                                                                    |                                                                                                                                                                                                                                                                                                                                                                                                                                                                                                                                                                                                                                                                                                                                                                                                       |   |                     |                       |   |                     |                   |   |                     |                                        |   |                     |                                                           |   |                     |                                                           |   |                     |                                                |   |                     |                                  |   |                     |              |   |                     |              |
| 4  | chest_pt_dislike__4                                                                                                                          | It is uncomfortable                                                              |                                                                                                                                                                                                                                                                                                                                                                                                                                                                                                                                                                                                                                                                                                                                                                                                       |   |                     |                       |   |                     |                   |   |                     |                                        |   |                     |                                                           |   |                     |                                                           |   |                     |                                                |   |                     |                                  |   |                     |              |   |                     |              |
| 5  | chest_pt_dislike__5                                                                                                                          | It is less effective than other forms of airway clearance                        |                                                                                                                                                                                                                                                                                                                                                                                                                                                                                                                                                                                                                                                                                                                                                                                                       |   |                     |                       |   |                     |                   |   |                     |                                        |   |                     |                                                           |   |                     |                                                           |   |                     |                                                |   |                     |                                  |   |                     |              |   |                     |              |
| 6  | chest_pt_dislike__6                                                                                                                          | It does not work well with my other treatments                                   |                                                                                                                                                                                                                                                                                                                                                                                                                                                                                                                                                                                                                                                                                                                                                                                                       |   |                     |                       |   |                     |                   |   |                     |                                        |   |                     |                                                           |   |                     |                                                           |   |                     |                                                |   |                     |                                  |   |                     |              |   |                     |              |
| 7  | chest_pt_dislike__7                                                                                                                          | It is unpleasant or embarrassing                                                 |                                                                                                                                                                                                                                                                                                                                                                                                                                                                                                                                                                                                                                                                                                                                                                                                       |   |                     |                       |   |                     |                   |   |                     |                                        |   |                     |                                                           |   |                     |                                                           |   |                     |                                                |   |                     |                                  |   |                     |              |   |                     |              |
| 8  | chest_pt_dislike__8                                                                                                                          | Nothing                                                                          |                                                                                                                                                                                                                                                                                                                                                                                                                                                                                                                                                                                                                                                                                                                                                                                                       |   |                     |                       |   |                     |                   |   |                     |                                        |   |                     |                                                           |   |                     |                                                           |   |                     |                                                |   |                     |                                  |   |                     |              |   |                     |              |
| 9  | chest_pt_dislike__9                                                                                                                          | I don't know                                                                     |                                                                                                                                                                                                                                                                                                                                                                                                                                                                                                                                                                                                                                                                                                                                                                                                       |   |                     |                       |   |                     |                   |   |                     |                                        |   |                     |                                                           |   |                     |                                                           |   |                     |                                                |   |                     |                                  |   |                     |              |   |                     |              |
| 31 | [chest_pt_follow_up]<br>Show the field ONLY if:<br>[chest_pt_dislike(3)] = '1' or [chest_pt_dislike(4)] = '1' or [chest_pt_dislike(7)] = '1' | Why is Manual Percussion (Chest PT) painful, uncomfortable or unpleasant?        | text                                                                                                                                                                                                                                                                                                                                                                                                                                                                                                                                                                                                                                                                                                                                                                                                  |   |                     |                       |   |                     |                   |   |                     |                                        |   |                     |                                                           |   |                     |                                                           |   |                     |                                                |   |                     |                                  |   |                     |              |   |                     |              |

|    |                                                                                                                                                        |                                                                                                                     |                                                                                                                                                                                                                                                                                                                                                                                                                                                                                                                                                                                                                                                                                                                                                                                                                                        |   |                   |                       |   |                   |                   |   |                   |               |   |                   |                     |   |                   |                                                           |   |                   |                                                |   |                   |                                  |   |                   |         |   |                   |                 |    |                    |                      |    |                    |                 |    |                    |       |
|----|--------------------------------------------------------------------------------------------------------------------------------------------------------|---------------------------------------------------------------------------------------------------------------------|----------------------------------------------------------------------------------------------------------------------------------------------------------------------------------------------------------------------------------------------------------------------------------------------------------------------------------------------------------------------------------------------------------------------------------------------------------------------------------------------------------------------------------------------------------------------------------------------------------------------------------------------------------------------------------------------------------------------------------------------------------------------------------------------------------------------------------------|---|-------------------|-----------------------|---|-------------------|-------------------|---|-------------------|---------------|---|-------------------|---------------------|---|-------------------|-----------------------------------------------------------|---|-------------------|------------------------------------------------|---|-------------------|----------------------------------|---|-------------------|---------|---|-------------------|-----------------|----|--------------------|----------------------|----|--------------------|-----------------|----|--------------------|-------|
| 32 | <p>[ chest_pt_where ]</p> <p>Show the field ONLY if:<br/>[chest_pt_dislike(3)] = '1' or [chest_pt_dislike(4)] = '1' or [chest_pt_dislike(7)] = '1'</p> | <p>Where on your body does Manual Percussion (Chest PT) bother you?</p> <p>Select ALL that apply</p>                | <p>checkbox</p> <table border="1"> <tr><td>1</td><td>chest_pt_where__1</td><td>head</td></tr> <tr><td>2</td><td>chest_pt_where__2</td><td>mouth</td></tr> <tr><td>3</td><td>chest_pt_where__3</td><td>throat</td></tr> <tr><td>4</td><td>chest_pt_where__4</td><td>neck</td></tr> <tr><td>5</td><td>chest_pt_where__5</td><td>back</td></tr> <tr><td>6</td><td>chest_pt_where__6</td><td>chest</td></tr> <tr><td>7</td><td>chest_pt_where__7</td><td>armpits</td></tr> <tr><td>8</td><td>chest_pt_where__8</td><td>breasts</td></tr> <tr><td>9</td><td>chest_pt_where__9</td><td>stomach/abdomen</td></tr> <tr><td>10</td><td>chest_pt_where__10</td><td>my port or PICC line</td></tr> <tr><td>11</td><td>chest_pt_where__11</td><td>my arms or legs</td></tr> <tr><td>12</td><td>chest_pt_where__12</td><td>other</td></tr> </table> | 1 | chest_pt_where__1 | head                  | 2 | chest_pt_where__2 | mouth             | 3 | chest_pt_where__3 | throat        | 4 | chest_pt_where__4 | neck                | 5 | chest_pt_where__5 | back                                                      | 6 | chest_pt_where__6 | chest                                          | 7 | chest_pt_where__7 | armpits                          | 8 | chest_pt_where__8 | breasts | 9 | chest_pt_where__9 | stomach/abdomen | 10 | chest_pt_where__10 | my port or PICC line | 11 | chest_pt_where__11 | my arms or legs | 12 | chest_pt_where__12 | other |
| 1  | chest_pt_where__1                                                                                                                                      | head                                                                                                                |                                                                                                                                                                                                                                                                                                                                                                                                                                                                                                                                                                                                                                                                                                                                                                                                                                        |   |                   |                       |   |                   |                   |   |                   |               |   |                   |                     |   |                   |                                                           |   |                   |                                                |   |                   |                                  |   |                   |         |   |                   |                 |    |                    |                      |    |                    |                 |    |                    |       |
| 2  | chest_pt_where__2                                                                                                                                      | mouth                                                                                                               |                                                                                                                                                                                                                                                                                                                                                                                                                                                                                                                                                                                                                                                                                                                                                                                                                                        |   |                   |                       |   |                   |                   |   |                   |               |   |                   |                     |   |                   |                                                           |   |                   |                                                |   |                   |                                  |   |                   |         |   |                   |                 |    |                    |                      |    |                    |                 |    |                    |       |
| 3  | chest_pt_where__3                                                                                                                                      | throat                                                                                                              |                                                                                                                                                                                                                                                                                                                                                                                                                                                                                                                                                                                                                                                                                                                                                                                                                                        |   |                   |                       |   |                   |                   |   |                   |               |   |                   |                     |   |                   |                                                           |   |                   |                                                |   |                   |                                  |   |                   |         |   |                   |                 |    |                    |                      |    |                    |                 |    |                    |       |
| 4  | chest_pt_where__4                                                                                                                                      | neck                                                                                                                |                                                                                                                                                                                                                                                                                                                                                                                                                                                                                                                                                                                                                                                                                                                                                                                                                                        |   |                   |                       |   |                   |                   |   |                   |               |   |                   |                     |   |                   |                                                           |   |                   |                                                |   |                   |                                  |   |                   |         |   |                   |                 |    |                    |                      |    |                    |                 |    |                    |       |
| 5  | chest_pt_where__5                                                                                                                                      | back                                                                                                                |                                                                                                                                                                                                                                                                                                                                                                                                                                                                                                                                                                                                                                                                                                                                                                                                                                        |   |                   |                       |   |                   |                   |   |                   |               |   |                   |                     |   |                   |                                                           |   |                   |                                                |   |                   |                                  |   |                   |         |   |                   |                 |    |                    |                      |    |                    |                 |    |                    |       |
| 6  | chest_pt_where__6                                                                                                                                      | chest                                                                                                               |                                                                                                                                                                                                                                                                                                                                                                                                                                                                                                                                                                                                                                                                                                                                                                                                                                        |   |                   |                       |   |                   |                   |   |                   |               |   |                   |                     |   |                   |                                                           |   |                   |                                                |   |                   |                                  |   |                   |         |   |                   |                 |    |                    |                      |    |                    |                 |    |                    |       |
| 7  | chest_pt_where__7                                                                                                                                      | armpits                                                                                                             |                                                                                                                                                                                                                                                                                                                                                                                                                                                                                                                                                                                                                                                                                                                                                                                                                                        |   |                   |                       |   |                   |                   |   |                   |               |   |                   |                     |   |                   |                                                           |   |                   |                                                |   |                   |                                  |   |                   |         |   |                   |                 |    |                    |                      |    |                    |                 |    |                    |       |
| 8  | chest_pt_where__8                                                                                                                                      | breasts                                                                                                             |                                                                                                                                                                                                                                                                                                                                                                                                                                                                                                                                                                                                                                                                                                                                                                                                                                        |   |                   |                       |   |                   |                   |   |                   |               |   |                   |                     |   |                   |                                                           |   |                   |                                                |   |                   |                                  |   |                   |         |   |                   |                 |    |                    |                      |    |                    |                 |    |                    |       |
| 9  | chest_pt_where__9                                                                                                                                      | stomach/abdomen                                                                                                     |                                                                                                                                                                                                                                                                                                                                                                                                                                                                                                                                                                                                                                                                                                                                                                                                                                        |   |                   |                       |   |                   |                   |   |                   |               |   |                   |                     |   |                   |                                                           |   |                   |                                                |   |                   |                                  |   |                   |         |   |                   |                 |    |                    |                      |    |                    |                 |    |                    |       |
| 10 | chest_pt_where__10                                                                                                                                     | my port or PICC line                                                                                                |                                                                                                                                                                                                                                                                                                                                                                                                                                                                                                                                                                                                                                                                                                                                                                                                                                        |   |                   |                       |   |                   |                   |   |                   |               |   |                   |                     |   |                   |                                                           |   |                   |                                                |   |                   |                                  |   |                   |         |   |                   |                 |    |                    |                      |    |                    |                 |    |                    |       |
| 11 | chest_pt_where__11                                                                                                                                     | my arms or legs                                                                                                     |                                                                                                                                                                                                                                                                                                                                                                                                                                                                                                                                                                                                                                                                                                                                                                                                                                        |   |                   |                       |   |                   |                   |   |                   |               |   |                   |                     |   |                   |                                                           |   |                   |                                                |   |                   |                                  |   |                   |         |   |                   |                 |    |                    |                      |    |                    |                 |    |                    |       |
| 12 | chest_pt_where__12                                                                                                                                     | other                                                                                                               |                                                                                                                                                                                                                                                                                                                                                                                                                                                                                                                                                                                                                                                                                                                                                                                                                                        |   |                   |                       |   |                   |                   |   |                   |               |   |                   |                     |   |                   |                                                           |   |                   |                                                |   |                   |                                  |   |                   |         |   |                   |                 |    |                    |                      |    |                    |                 |    |                    |       |
| 33 | <p>[ ipv_dislike ]</p> <p>Show the field ONLY if:<br/>[ever_used(2)] = '1'</p>                                                                         | <p>What do you DISLIKE about Intrapulmonary Percussive Ventilation (IPV)?</p> <p>Select ALL that apply</p>          | <p>checkbox</p> <table border="1"> <tr><td>1</td><td>ipv_dislike__1</td><td>I get short of breath</td></tr> <tr><td>2</td><td>ipv_dislike__2</td><td>It takes too long</td></tr> <tr><td>3</td><td>ipv_dislike__3</td><td>It is painful</td></tr> <tr><td>4</td><td>ipv_dislike__4</td><td>It is uncomfortable</td></tr> <tr><td>5</td><td>ipv_dislike__5</td><td>It is less effective than other forms of airway clearance</td></tr> <tr><td>6</td><td>ipv_dislike__6</td><td>It does not work well with my other treatments</td></tr> <tr><td>7</td><td>ipv_dislike__7</td><td>It is unpleasant or embarrassing</td></tr> <tr><td>8</td><td>ipv_dislike__8</td><td>Nothing</td></tr> <tr><td>9</td><td>ipv_dislike__9</td><td>I don't know</td></tr> </table>                                                                        | 1 | ipv_dislike__1    | I get short of breath | 2 | ipv_dislike__2    | It takes too long | 3 | ipv_dislike__3    | It is painful | 4 | ipv_dislike__4    | It is uncomfortable | 5 | ipv_dislike__5    | It is less effective than other forms of airway clearance | 6 | ipv_dislike__6    | It does not work well with my other treatments | 7 | ipv_dislike__7    | It is unpleasant or embarrassing | 8 | ipv_dislike__8    | Nothing | 9 | ipv_dislike__9    | I don't know    |    |                    |                      |    |                    |                 |    |                    |       |
| 1  | ipv_dislike__1                                                                                                                                         | I get short of breath                                                                                               |                                                                                                                                                                                                                                                                                                                                                                                                                                                                                                                                                                                                                                                                                                                                                                                                                                        |   |                   |                       |   |                   |                   |   |                   |               |   |                   |                     |   |                   |                                                           |   |                   |                                                |   |                   |                                  |   |                   |         |   |                   |                 |    |                    |                      |    |                    |                 |    |                    |       |
| 2  | ipv_dislike__2                                                                                                                                         | It takes too long                                                                                                   |                                                                                                                                                                                                                                                                                                                                                                                                                                                                                                                                                                                                                                                                                                                                                                                                                                        |   |                   |                       |   |                   |                   |   |                   |               |   |                   |                     |   |                   |                                                           |   |                   |                                                |   |                   |                                  |   |                   |         |   |                   |                 |    |                    |                      |    |                    |                 |    |                    |       |
| 3  | ipv_dislike__3                                                                                                                                         | It is painful                                                                                                       |                                                                                                                                                                                                                                                                                                                                                                                                                                                                                                                                                                                                                                                                                                                                                                                                                                        |   |                   |                       |   |                   |                   |   |                   |               |   |                   |                     |   |                   |                                                           |   |                   |                                                |   |                   |                                  |   |                   |         |   |                   |                 |    |                    |                      |    |                    |                 |    |                    |       |
| 4  | ipv_dislike__4                                                                                                                                         | It is uncomfortable                                                                                                 |                                                                                                                                                                                                                                                                                                                                                                                                                                                                                                                                                                                                                                                                                                                                                                                                                                        |   |                   |                       |   |                   |                   |   |                   |               |   |                   |                     |   |                   |                                                           |   |                   |                                                |   |                   |                                  |   |                   |         |   |                   |                 |    |                    |                      |    |                    |                 |    |                    |       |
| 5  | ipv_dislike__5                                                                                                                                         | It is less effective than other forms of airway clearance                                                           |                                                                                                                                                                                                                                                                                                                                                                                                                                                                                                                                                                                                                                                                                                                                                                                                                                        |   |                   |                       |   |                   |                   |   |                   |               |   |                   |                     |   |                   |                                                           |   |                   |                                                |   |                   |                                  |   |                   |         |   |                   |                 |    |                    |                      |    |                    |                 |    |                    |       |
| 6  | ipv_dislike__6                                                                                                                                         | It does not work well with my other treatments                                                                      |                                                                                                                                                                                                                                                                                                                                                                                                                                                                                                                                                                                                                                                                                                                                                                                                                                        |   |                   |                       |   |                   |                   |   |                   |               |   |                   |                     |   |                   |                                                           |   |                   |                                                |   |                   |                                  |   |                   |         |   |                   |                 |    |                    |                      |    |                    |                 |    |                    |       |
| 7  | ipv_dislike__7                                                                                                                                         | It is unpleasant or embarrassing                                                                                    |                                                                                                                                                                                                                                                                                                                                                                                                                                                                                                                                                                                                                                                                                                                                                                                                                                        |   |                   |                       |   |                   |                   |   |                   |               |   |                   |                     |   |                   |                                                           |   |                   |                                                |   |                   |                                  |   |                   |         |   |                   |                 |    |                    |                      |    |                    |                 |    |                    |       |
| 8  | ipv_dislike__8                                                                                                                                         | Nothing                                                                                                             |                                                                                                                                                                                                                                                                                                                                                                                                                                                                                                                                                                                                                                                                                                                                                                                                                                        |   |                   |                       |   |                   |                   |   |                   |               |   |                   |                     |   |                   |                                                           |   |                   |                                                |   |                   |                                  |   |                   |         |   |                   |                 |    |                    |                      |    |                    |                 |    |                    |       |
| 9  | ipv_dislike__9                                                                                                                                         | I don't know                                                                                                        |                                                                                                                                                                                                                                                                                                                                                                                                                                                                                                                                                                                                                                                                                                                                                                                                                                        |   |                   |                       |   |                   |                   |   |                   |               |   |                   |                     |   |                   |                                                           |   |                   |                                                |   |                   |                                  |   |                   |         |   |                   |                 |    |                    |                      |    |                    |                 |    |                    |       |
| 34 | <p>[ ipv_follow_up ]</p> <p>Show the field ONLY if:<br/>[ipv_dislike(3)] = '1' or [ipv_dislike(4)] = '1' or [ipv_dislike(7)] = '1'</p>                 | <p>Why is Intrapulmonary Percussive Ventilation (IPV) painful, uncomfortable or unpleasant?</p>                     | <p>text</p>                                                                                                                                                                                                                                                                                                                                                                                                                                                                                                                                                                                                                                                                                                                                                                                                                            |   |                   |                       |   |                   |                   |   |                   |               |   |                   |                     |   |                   |                                                           |   |                   |                                                |   |                   |                                  |   |                   |         |   |                   |                 |    |                    |                      |    |                    |                 |    |                    |       |
| 35 | <p>[ ipv_where ]</p> <p>Show the field ONLY if:<br/>[ipv_dislike(3)] = '1' or [ipv_dislike(4)] = '1' or [ipv_dislike(7)] = '1'</p>                     | <p>Where on your body does Intrapulmonary Percussive Ventilation (IPV) bother you?</p> <p>Select ALL that apply</p> | <p>checkbox</p> <table border="1"> <tr><td>1</td><td>ipv_where__1</td><td>head</td></tr> <tr><td>2</td><td>ipv_where__2</td><td>mouth</td></tr> <tr><td>3</td><td>ipv_where__3</td><td>throat</td></tr> <tr><td>4</td><td>ipv_where__4</td><td>neck</td></tr> <tr><td>5</td><td>ipv_where__5</td><td>back</td></tr> <tr><td>6</td><td>ipv_where__6</td><td>chest</td></tr> <tr><td>7</td><td>ipv_where__7</td><td>armpits</td></tr> <tr><td>8</td><td>ipv_where__8</td><td>breasts</td></tr> <tr><td>9</td><td>ipv_where__9</td><td>stomach/abdomen</td></tr> <tr><td>10</td><td>ipv_where__10</td><td>my port or PICC line</td></tr> <tr><td>11</td><td>ipv_where__11</td><td>my arms or legs</td></tr> <tr><td>12</td><td>ipv_where__12</td><td>other</td></tr> </table>                                                             | 1 | ipv_where__1      | head                  | 2 | ipv_where__2      | mouth             | 3 | ipv_where__3      | throat        | 4 | ipv_where__4      | neck                | 5 | ipv_where__5      | back                                                      | 6 | ipv_where__6      | chest                                          | 7 | ipv_where__7      | armpits                          | 8 | ipv_where__8      | breasts | 9 | ipv_where__9      | stomach/abdomen | 10 | ipv_where__10      | my port or PICC line | 11 | ipv_where__11      | my arms or legs | 12 | ipv_where__12      | other |
| 1  | ipv_where__1                                                                                                                                           | head                                                                                                                |                                                                                                                                                                                                                                                                                                                                                                                                                                                                                                                                                                                                                                                                                                                                                                                                                                        |   |                   |                       |   |                   |                   |   |                   |               |   |                   |                     |   |                   |                                                           |   |                   |                                                |   |                   |                                  |   |                   |         |   |                   |                 |    |                    |                      |    |                    |                 |    |                    |       |
| 2  | ipv_where__2                                                                                                                                           | mouth                                                                                                               |                                                                                                                                                                                                                                                                                                                                                                                                                                                                                                                                                                                                                                                                                                                                                                                                                                        |   |                   |                       |   |                   |                   |   |                   |               |   |                   |                     |   |                   |                                                           |   |                   |                                                |   |                   |                                  |   |                   |         |   |                   |                 |    |                    |                      |    |                    |                 |    |                    |       |
| 3  | ipv_where__3                                                                                                                                           | throat                                                                                                              |                                                                                                                                                                                                                                                                                                                                                                                                                                                                                                                                                                                                                                                                                                                                                                                                                                        |   |                   |                       |   |                   |                   |   |                   |               |   |                   |                     |   |                   |                                                           |   |                   |                                                |   |                   |                                  |   |                   |         |   |                   |                 |    |                    |                      |    |                    |                 |    |                    |       |
| 4  | ipv_where__4                                                                                                                                           | neck                                                                                                                |                                                                                                                                                                                                                                                                                                                                                                                                                                                                                                                                                                                                                                                                                                                                                                                                                                        |   |                   |                       |   |                   |                   |   |                   |               |   |                   |                     |   |                   |                                                           |   |                   |                                                |   |                   |                                  |   |                   |         |   |                   |                 |    |                    |                      |    |                    |                 |    |                    |       |
| 5  | ipv_where__5                                                                                                                                           | back                                                                                                                |                                                                                                                                                                                                                                                                                                                                                                                                                                                                                                                                                                                                                                                                                                                                                                                                                                        |   |                   |                       |   |                   |                   |   |                   |               |   |                   |                     |   |                   |                                                           |   |                   |                                                |   |                   |                                  |   |                   |         |   |                   |                 |    |                    |                      |    |                    |                 |    |                    |       |
| 6  | ipv_where__6                                                                                                                                           | chest                                                                                                               |                                                                                                                                                                                                                                                                                                                                                                                                                                                                                                                                                                                                                                                                                                                                                                                                                                        |   |                   |                       |   |                   |                   |   |                   |               |   |                   |                     |   |                   |                                                           |   |                   |                                                |   |                   |                                  |   |                   |         |   |                   |                 |    |                    |                      |    |                    |                 |    |                    |       |
| 7  | ipv_where__7                                                                                                                                           | armpits                                                                                                             |                                                                                                                                                                                                                                                                                                                                                                                                                                                                                                                                                                                                                                                                                                                                                                                                                                        |   |                   |                       |   |                   |                   |   |                   |               |   |                   |                     |   |                   |                                                           |   |                   |                                                |   |                   |                                  |   |                   |         |   |                   |                 |    |                    |                      |    |                    |                 |    |                    |       |
| 8  | ipv_where__8                                                                                                                                           | breasts                                                                                                             |                                                                                                                                                                                                                                                                                                                                                                                                                                                                                                                                                                                                                                                                                                                                                                                                                                        |   |                   |                       |   |                   |                   |   |                   |               |   |                   |                     |   |                   |                                                           |   |                   |                                                |   |                   |                                  |   |                   |         |   |                   |                 |    |                    |                      |    |                    |                 |    |                    |       |
| 9  | ipv_where__9                                                                                                                                           | stomach/abdomen                                                                                                     |                                                                                                                                                                                                                                                                                                                                                                                                                                                                                                                                                                                                                                                                                                                                                                                                                                        |   |                   |                       |   |                   |                   |   |                   |               |   |                   |                     |   |                   |                                                           |   |                   |                                                |   |                   |                                  |   |                   |         |   |                   |                 |    |                    |                      |    |                    |                 |    |                    |       |
| 10 | ipv_where__10                                                                                                                                          | my port or PICC line                                                                                                |                                                                                                                                                                                                                                                                                                                                                                                                                                                                                                                                                                                                                                                                                                                                                                                                                                        |   |                   |                       |   |                   |                   |   |                   |               |   |                   |                     |   |                   |                                                           |   |                   |                                                |   |                   |                                  |   |                   |         |   |                   |                 |    |                    |                      |    |                    |                 |    |                    |       |
| 11 | ipv_where__11                                                                                                                                          | my arms or legs                                                                                                     |                                                                                                                                                                                                                                                                                                                                                                                                                                                                                                                                                                                                                                                                                                                                                                                                                                        |   |                   |                       |   |                   |                   |   |                   |               |   |                   |                     |   |                   |                                                           |   |                   |                                                |   |                   |                                  |   |                   |         |   |                   |                 |    |                    |                      |    |                    |                 |    |                    |       |
| 12 | ipv_where__12                                                                                                                                          | other                                                                                                               |                                                                                                                                                                                                                                                                                                                                                                                                                                                                                                                                                                                                                                                                                                                                                                                                                                        |   |                   |                       |   |                   |                   |   |                   |               |   |                   |                     |   |                   |                                                           |   |                   |                                                |   |                   |                                  |   |                   |         |   |                   |                 |    |                    |                      |    |                    |                 |    |                    |       |

|    |                                                                                                                                                 |                                                                                                                                       |                                                                                                                                                                                                                                                                                                                                                                                                                                                                                                                                                                                                                                                                                                                                                                                        |   |                 |                       |   |                 |                   |   |                 |               |   |                 |                     |   |                 |                                                           |   |                 |                                                |   |                 |                                  |   |                 |         |   |                 |                 |    |                |                      |    |                |                 |    |                |       |
|----|-------------------------------------------------------------------------------------------------------------------------------------------------|---------------------------------------------------------------------------------------------------------------------------------------|----------------------------------------------------------------------------------------------------------------------------------------------------------------------------------------------------------------------------------------------------------------------------------------------------------------------------------------------------------------------------------------------------------------------------------------------------------------------------------------------------------------------------------------------------------------------------------------------------------------------------------------------------------------------------------------------------------------------------------------------------------------------------------------|---|-----------------|-----------------------|---|-----------------|-------------------|---|-----------------|---------------|---|-----------------|---------------------|---|-----------------|-----------------------------------------------------------|---|-----------------|------------------------------------------------|---|-----------------|----------------------------------|---|-----------------|---------|---|-----------------|-----------------|----|----------------|----------------------|----|----------------|-----------------|----|----------------|-------|
| 36 | <p><b>[vest_dislike]</b></p> <p>Show the field ONLY if:<br/>[ever_used(3)] = '1'</p>                                                            | <p>What do you DISLIKE about High Frequency Chest Wall Oscillation (Vest)?<br/>Select ALL that apply</p>                              | <p>checkbox</p> <table border="1"> <tr><td>1</td><td>vest_dislike__1</td><td>I get short of breath</td></tr> <tr><td>2</td><td>vest_dislike__2</td><td>It takes too long</td></tr> <tr><td>3</td><td>vest_dislike__3</td><td>It is painful</td></tr> <tr><td>4</td><td>vest_dislike__4</td><td>It is uncomfortable</td></tr> <tr><td>5</td><td>vest_dislike__5</td><td>It is less effective than other forms of airway clearance</td></tr> <tr><td>6</td><td>vest_dislike__6</td><td>It does not work well with my other treatments</td></tr> <tr><td>7</td><td>vest_dislike__7</td><td>It is unpleasant or embarrassing</td></tr> <tr><td>8</td><td>vest_dislike__8</td><td>Nothing</td></tr> <tr><td>9</td><td>vest_dislike__9</td><td>I don't know</td></tr> </table>               | 1 | vest_dislike__1 | I get short of breath | 2 | vest_dislike__2 | It takes too long | 3 | vest_dislike__3 | It is painful | 4 | vest_dislike__4 | It is uncomfortable | 5 | vest_dislike__5 | It is less effective than other forms of airway clearance | 6 | vest_dislike__6 | It does not work well with my other treatments | 7 | vest_dislike__7 | It is unpleasant or embarrassing | 8 | vest_dislike__8 | Nothing | 9 | vest_dislike__9 | I don't know    |    |                |                      |    |                |                 |    |                |       |
| 1  | vest_dislike__1                                                                                                                                 | I get short of breath                                                                                                                 |                                                                                                                                                                                                                                                                                                                                                                                                                                                                                                                                                                                                                                                                                                                                                                                        |   |                 |                       |   |                 |                   |   |                 |               |   |                 |                     |   |                 |                                                           |   |                 |                                                |   |                 |                                  |   |                 |         |   |                 |                 |    |                |                      |    |                |                 |    |                |       |
| 2  | vest_dislike__2                                                                                                                                 | It takes too long                                                                                                                     |                                                                                                                                                                                                                                                                                                                                                                                                                                                                                                                                                                                                                                                                                                                                                                                        |   |                 |                       |   |                 |                   |   |                 |               |   |                 |                     |   |                 |                                                           |   |                 |                                                |   |                 |                                  |   |                 |         |   |                 |                 |    |                |                      |    |                |                 |    |                |       |
| 3  | vest_dislike__3                                                                                                                                 | It is painful                                                                                                                         |                                                                                                                                                                                                                                                                                                                                                                                                                                                                                                                                                                                                                                                                                                                                                                                        |   |                 |                       |   |                 |                   |   |                 |               |   |                 |                     |   |                 |                                                           |   |                 |                                                |   |                 |                                  |   |                 |         |   |                 |                 |    |                |                      |    |                |                 |    |                |       |
| 4  | vest_dislike__4                                                                                                                                 | It is uncomfortable                                                                                                                   |                                                                                                                                                                                                                                                                                                                                                                                                                                                                                                                                                                                                                                                                                                                                                                                        |   |                 |                       |   |                 |                   |   |                 |               |   |                 |                     |   |                 |                                                           |   |                 |                                                |   |                 |                                  |   |                 |         |   |                 |                 |    |                |                      |    |                |                 |    |                |       |
| 5  | vest_dislike__5                                                                                                                                 | It is less effective than other forms of airway clearance                                                                             |                                                                                                                                                                                                                                                                                                                                                                                                                                                                                                                                                                                                                                                                                                                                                                                        |   |                 |                       |   |                 |                   |   |                 |               |   |                 |                     |   |                 |                                                           |   |                 |                                                |   |                 |                                  |   |                 |         |   |                 |                 |    |                |                      |    |                |                 |    |                |       |
| 6  | vest_dislike__6                                                                                                                                 | It does not work well with my other treatments                                                                                        |                                                                                                                                                                                                                                                                                                                                                                                                                                                                                                                                                                                                                                                                                                                                                                                        |   |                 |                       |   |                 |                   |   |                 |               |   |                 |                     |   |                 |                                                           |   |                 |                                                |   |                 |                                  |   |                 |         |   |                 |                 |    |                |                      |    |                |                 |    |                |       |
| 7  | vest_dislike__7                                                                                                                                 | It is unpleasant or embarrassing                                                                                                      |                                                                                                                                                                                                                                                                                                                                                                                                                                                                                                                                                                                                                                                                                                                                                                                        |   |                 |                       |   |                 |                   |   |                 |               |   |                 |                     |   |                 |                                                           |   |                 |                                                |   |                 |                                  |   |                 |         |   |                 |                 |    |                |                      |    |                |                 |    |                |       |
| 8  | vest_dislike__8                                                                                                                                 | Nothing                                                                                                                               |                                                                                                                                                                                                                                                                                                                                                                                                                                                                                                                                                                                                                                                                                                                                                                                        |   |                 |                       |   |                 |                   |   |                 |               |   |                 |                     |   |                 |                                                           |   |                 |                                                |   |                 |                                  |   |                 |         |   |                 |                 |    |                |                      |    |                |                 |    |                |       |
| 9  | vest_dislike__9                                                                                                                                 | I don't know                                                                                                                          |                                                                                                                                                                                                                                                                                                                                                                                                                                                                                                                                                                                                                                                                                                                                                                                        |   |                 |                       |   |                 |                   |   |                 |               |   |                 |                     |   |                 |                                                           |   |                 |                                                |   |                 |                                  |   |                 |         |   |                 |                 |    |                |                      |    |                |                 |    |                |       |
| 37 | <p><b>[vest_follow_up]</b></p> <p>Show the field ONLY if:<br/>[vest_dislike(3)] = '1' or [vest_dislike(4)] = '1' or [vest_dislike(7)] = '1'</p> | <p>Why is the High Frequency Chest Wall Oscillation (Vest) painful, uncomfortable or unpleasant?</p>                                  | <p>text</p>                                                                                                                                                                                                                                                                                                                                                                                                                                                                                                                                                                                                                                                                                                                                                                            |   |                 |                       |   |                 |                   |   |                 |               |   |                 |                     |   |                 |                                                           |   |                 |                                                |   |                 |                                  |   |                 |         |   |                 |                 |    |                |                      |    |                |                 |    |                |       |
| 38 | <p><b>[vest_where]</b></p> <p>Show the field ONLY if:<br/>[vest_dislike(3)] = '1' or [vest_dislike(4)] = '1' or [vest_dislike(7)] = '1'</p>     | <p>Where on your body does High Frequency Chest Wall Oscillation (Vest) bother you?<br/>Select ALL that apply</p>                     | <p>checkbox</p> <table border="1"> <tr><td>1</td><td>vest_where__1</td><td>head</td></tr> <tr><td>2</td><td>vest_where__2</td><td>mouth</td></tr> <tr><td>3</td><td>vest_where__3</td><td>throat</td></tr> <tr><td>4</td><td>vest_where__4</td><td>neck</td></tr> <tr><td>5</td><td>vest_where__5</td><td>back</td></tr> <tr><td>6</td><td>vest_where__6</td><td>chest</td></tr> <tr><td>7</td><td>vest_where__7</td><td>armpits</td></tr> <tr><td>8</td><td>vest_where__8</td><td>breasts</td></tr> <tr><td>9</td><td>vest_where__9</td><td>stomach/abdomen</td></tr> <tr><td>10</td><td>vest_where__10</td><td>my port or PICC line</td></tr> <tr><td>11</td><td>vest_where__11</td><td>my arms or legs</td></tr> <tr><td>12</td><td>vest_where__12</td><td>other</td></tr> </table> | 1 | vest_where__1   | head                  | 2 | vest_where__2   | mouth             | 3 | vest_where__3   | throat        | 4 | vest_where__4   | neck                | 5 | vest_where__5   | back                                                      | 6 | vest_where__6   | chest                                          | 7 | vest_where__7   | armpits                          | 8 | vest_where__8   | breasts | 9 | vest_where__9   | stomach/abdomen | 10 | vest_where__10 | my port or PICC line | 11 | vest_where__11 | my arms or legs | 12 | vest_where__12 | other |
| 1  | vest_where__1                                                                                                                                   | head                                                                                                                                  |                                                                                                                                                                                                                                                                                                                                                                                                                                                                                                                                                                                                                                                                                                                                                                                        |   |                 |                       |   |                 |                   |   |                 |               |   |                 |                     |   |                 |                                                           |   |                 |                                                |   |                 |                                  |   |                 |         |   |                 |                 |    |                |                      |    |                |                 |    |                |       |
| 2  | vest_where__2                                                                                                                                   | mouth                                                                                                                                 |                                                                                                                                                                                                                                                                                                                                                                                                                                                                                                                                                                                                                                                                                                                                                                                        |   |                 |                       |   |                 |                   |   |                 |               |   |                 |                     |   |                 |                                                           |   |                 |                                                |   |                 |                                  |   |                 |         |   |                 |                 |    |                |                      |    |                |                 |    |                |       |
| 3  | vest_where__3                                                                                                                                   | throat                                                                                                                                |                                                                                                                                                                                                                                                                                                                                                                                                                                                                                                                                                                                                                                                                                                                                                                                        |   |                 |                       |   |                 |                   |   |                 |               |   |                 |                     |   |                 |                                                           |   |                 |                                                |   |                 |                                  |   |                 |         |   |                 |                 |    |                |                      |    |                |                 |    |                |       |
| 4  | vest_where__4                                                                                                                                   | neck                                                                                                                                  |                                                                                                                                                                                                                                                                                                                                                                                                                                                                                                                                                                                                                                                                                                                                                                                        |   |                 |                       |   |                 |                   |   |                 |               |   |                 |                     |   |                 |                                                           |   |                 |                                                |   |                 |                                  |   |                 |         |   |                 |                 |    |                |                      |    |                |                 |    |                |       |
| 5  | vest_where__5                                                                                                                                   | back                                                                                                                                  |                                                                                                                                                                                                                                                                                                                                                                                                                                                                                                                                                                                                                                                                                                                                                                                        |   |                 |                       |   |                 |                   |   |                 |               |   |                 |                     |   |                 |                                                           |   |                 |                                                |   |                 |                                  |   |                 |         |   |                 |                 |    |                |                      |    |                |                 |    |                |       |
| 6  | vest_where__6                                                                                                                                   | chest                                                                                                                                 |                                                                                                                                                                                                                                                                                                                                                                                                                                                                                                                                                                                                                                                                                                                                                                                        |   |                 |                       |   |                 |                   |   |                 |               |   |                 |                     |   |                 |                                                           |   |                 |                                                |   |                 |                                  |   |                 |         |   |                 |                 |    |                |                      |    |                |                 |    |                |       |
| 7  | vest_where__7                                                                                                                                   | armpits                                                                                                                               |                                                                                                                                                                                                                                                                                                                                                                                                                                                                                                                                                                                                                                                                                                                                                                                        |   |                 |                       |   |                 |                   |   |                 |               |   |                 |                     |   |                 |                                                           |   |                 |                                                |   |                 |                                  |   |                 |         |   |                 |                 |    |                |                      |    |                |                 |    |                |       |
| 8  | vest_where__8                                                                                                                                   | breasts                                                                                                                               |                                                                                                                                                                                                                                                                                                                                                                                                                                                                                                                                                                                                                                                                                                                                                                                        |   |                 |                       |   |                 |                   |   |                 |               |   |                 |                     |   |                 |                                                           |   |                 |                                                |   |                 |                                  |   |                 |         |   |                 |                 |    |                |                      |    |                |                 |    |                |       |
| 9  | vest_where__9                                                                                                                                   | stomach/abdomen                                                                                                                       |                                                                                                                                                                                                                                                                                                                                                                                                                                                                                                                                                                                                                                                                                                                                                                                        |   |                 |                       |   |                 |                   |   |                 |               |   |                 |                     |   |                 |                                                           |   |                 |                                                |   |                 |                                  |   |                 |         |   |                 |                 |    |                |                      |    |                |                 |    |                |       |
| 10 | vest_where__10                                                                                                                                  | my port or PICC line                                                                                                                  |                                                                                                                                                                                                                                                                                                                                                                                                                                                                                                                                                                                                                                                                                                                                                                                        |   |                 |                       |   |                 |                   |   |                 |               |   |                 |                     |   |                 |                                                           |   |                 |                                                |   |                 |                                  |   |                 |         |   |                 |                 |    |                |                      |    |                |                 |    |                |       |
| 11 | vest_where__11                                                                                                                                  | my arms or legs                                                                                                                       |                                                                                                                                                                                                                                                                                                                                                                                                                                                                                                                                                                                                                                                                                                                                                                                        |   |                 |                       |   |                 |                   |   |                 |               |   |                 |                     |   |                 |                                                           |   |                 |                                                |   |                 |                                  |   |                 |         |   |                 |                 |    |                |                      |    |                |                 |    |                |       |
| 12 | vest_where__12                                                                                                                                  | other                                                                                                                                 |                                                                                                                                                                                                                                                                                                                                                                                                                                                                                                                                                                                                                                                                                                                                                                                        |   |                 |                       |   |                 |                   |   |                 |               |   |                 |                     |   |                 |                                                           |   |                 |                                                |   |                 |                                  |   |                 |         |   |                 |                 |    |                |                      |    |                |                 |    |                |       |
| 39 | <p><b>[pep_dislike]</b></p> <p>Show the field ONLY if:<br/>[ever_used(4)] = '1'</p>                                                             | <p>What do you DISLIKE about Oscillating Positive Expiratory Pressure (PEP), e.g. Aerobika or Acapella?<br/>Select ALL that apply</p> | <p>checkbox</p> <table border="1"> <tr><td>1</td><td>pep_dislike__1</td><td>I get short of breath</td></tr> <tr><td>2</td><td>pep_dislike__2</td><td>It takes too long</td></tr> <tr><td>3</td><td>pep_dislike__3</td><td>It is painful</td></tr> <tr><td>4</td><td>pep_dislike__4</td><td>It is uncomfortable</td></tr> <tr><td>5</td><td>pep_dislike__5</td><td>It is less effective than other forms of airway clearance</td></tr> <tr><td>6</td><td>pep_dislike__6</td><td>It does not work well with my other treatments</td></tr> <tr><td>7</td><td>pep_dislike__7</td><td>It is unpleasant or embarrassing</td></tr> <tr><td>8</td><td>pep_dislike__8</td><td>Nothing</td></tr> <tr><td>9</td><td>pep_dislike__9</td><td>I don't know</td></tr> </table>                        | 1 | pep_dislike__1  | I get short of breath | 2 | pep_dislike__2  | It takes too long | 3 | pep_dislike__3  | It is painful | 4 | pep_dislike__4  | It is uncomfortable | 5 | pep_dislike__5  | It is less effective than other forms of airway clearance | 6 | pep_dislike__6  | It does not work well with my other treatments | 7 | pep_dislike__7  | It is unpleasant or embarrassing | 8 | pep_dislike__8  | Nothing | 9 | pep_dislike__9  | I don't know    |    |                |                      |    |                |                 |    |                |       |
| 1  | pep_dislike__1                                                                                                                                  | I get short of breath                                                                                                                 |                                                                                                                                                                                                                                                                                                                                                                                                                                                                                                                                                                                                                                                                                                                                                                                        |   |                 |                       |   |                 |                   |   |                 |               |   |                 |                     |   |                 |                                                           |   |                 |                                                |   |                 |                                  |   |                 |         |   |                 |                 |    |                |                      |    |                |                 |    |                |       |
| 2  | pep_dislike__2                                                                                                                                  | It takes too long                                                                                                                     |                                                                                                                                                                                                                                                                                                                                                                                                                                                                                                                                                                                                                                                                                                                                                                                        |   |                 |                       |   |                 |                   |   |                 |               |   |                 |                     |   |                 |                                                           |   |                 |                                                |   |                 |                                  |   |                 |         |   |                 |                 |    |                |                      |    |                |                 |    |                |       |
| 3  | pep_dislike__3                                                                                                                                  | It is painful                                                                                                                         |                                                                                                                                                                                                                                                                                                                                                                                                                                                                                                                                                                                                                                                                                                                                                                                        |   |                 |                       |   |                 |                   |   |                 |               |   |                 |                     |   |                 |                                                           |   |                 |                                                |   |                 |                                  |   |                 |         |   |                 |                 |    |                |                      |    |                |                 |    |                |       |
| 4  | pep_dislike__4                                                                                                                                  | It is uncomfortable                                                                                                                   |                                                                                                                                                                                                                                                                                                                                                                                                                                                                                                                                                                                                                                                                                                                                                                                        |   |                 |                       |   |                 |                   |   |                 |               |   |                 |                     |   |                 |                                                           |   |                 |                                                |   |                 |                                  |   |                 |         |   |                 |                 |    |                |                      |    |                |                 |    |                |       |
| 5  | pep_dislike__5                                                                                                                                  | It is less effective than other forms of airway clearance                                                                             |                                                                                                                                                                                                                                                                                                                                                                                                                                                                                                                                                                                                                                                                                                                                                                                        |   |                 |                       |   |                 |                   |   |                 |               |   |                 |                     |   |                 |                                                           |   |                 |                                                |   |                 |                                  |   |                 |         |   |                 |                 |    |                |                      |    |                |                 |    |                |       |
| 6  | pep_dislike__6                                                                                                                                  | It does not work well with my other treatments                                                                                        |                                                                                                                                                                                                                                                                                                                                                                                                                                                                                                                                                                                                                                                                                                                                                                                        |   |                 |                       |   |                 |                   |   |                 |               |   |                 |                     |   |                 |                                                           |   |                 |                                                |   |                 |                                  |   |                 |         |   |                 |                 |    |                |                      |    |                |                 |    |                |       |
| 7  | pep_dislike__7                                                                                                                                  | It is unpleasant or embarrassing                                                                                                      |                                                                                                                                                                                                                                                                                                                                                                                                                                                                                                                                                                                                                                                                                                                                                                                        |   |                 |                       |   |                 |                   |   |                 |               |   |                 |                     |   |                 |                                                           |   |                 |                                                |   |                 |                                  |   |                 |         |   |                 |                 |    |                |                      |    |                |                 |    |                |       |
| 8  | pep_dislike__8                                                                                                                                  | Nothing                                                                                                                               |                                                                                                                                                                                                                                                                                                                                                                                                                                                                                                                                                                                                                                                                                                                                                                                        |   |                 |                       |   |                 |                   |   |                 |               |   |                 |                     |   |                 |                                                           |   |                 |                                                |   |                 |                                  |   |                 |         |   |                 |                 |    |                |                      |    |                |                 |    |                |       |
| 9  | pep_dislike__9                                                                                                                                  | I don't know                                                                                                                          |                                                                                                                                                                                                                                                                                                                                                                                                                                                                                                                                                                                                                                                                                                                                                                                        |   |                 |                       |   |                 |                   |   |                 |               |   |                 |                     |   |                 |                                                           |   |                 |                                                |   |                 |                                  |   |                 |         |   |                 |                 |    |                |                      |    |                |                 |    |                |       |
| 40 | <p><b>[pep_follow_up]</b></p> <p>Show the field ONLY if:<br/>[pep_dislike(3)] = '1' or [pep_dislike(4)] = '1' or [pep_dislike(7)] = '1'</p>     | <p>Why is Oscillating Positive Expiratory Pressure (PEP), e.g. Aerobika or Acapella painful, uncomfortable or unpleasant?</p>         | <p>text</p>                                                                                                                                                                                                                                                                                                                                                                                                                                                                                                                                                                                                                                                                                                                                                                            |   |                 |                       |   |                 |                   |   |                 |               |   |                 |                     |   |                 |                                                           |   |                 |                                                |   |                 |                                  |   |                 |         |   |                 |                 |    |                |                      |    |                |                 |    |                |       |

|    |                                                                                                                                                                   |                                                                                                                                                   |                                                                                                                                                                                                                                                                                                                                                                                                                                                                                                                                                                                                                                                                                                                                                                                                                                        |   |                     |                       |   |                     |                   |   |                     |               |   |                     |                     |   |                     |                                                           |   |                     |                                                |   |                     |                                  |   |                     |         |   |                     |                 |    |                    |                      |    |                    |                 |    |                    |       |
|----|-------------------------------------------------------------------------------------------------------------------------------------------------------------------|---------------------------------------------------------------------------------------------------------------------------------------------------|----------------------------------------------------------------------------------------------------------------------------------------------------------------------------------------------------------------------------------------------------------------------------------------------------------------------------------------------------------------------------------------------------------------------------------------------------------------------------------------------------------------------------------------------------------------------------------------------------------------------------------------------------------------------------------------------------------------------------------------------------------------------------------------------------------------------------------------|---|---------------------|-----------------------|---|---------------------|-------------------|---|---------------------|---------------|---|---------------------|---------------------|---|---------------------|-----------------------------------------------------------|---|---------------------|------------------------------------------------|---|---------------------|----------------------------------|---|---------------------|---------|---|---------------------|-----------------|----|--------------------|----------------------|----|--------------------|-----------------|----|--------------------|-------|
| 41 | <p>[ <b>pep_where</b> ]</p> <p>Show the field ONLY if:<br/>[pep_dislike(3)] = '1' or [pep_dislike(4)] = '1' or [pep_dislike(7)] = '1'</p>                         | <p>Where on your body does Oscillating Positive Expiratory Pressure (PEP), e.g. Aerobika or Acapella bother you?</p> <p>Select ALL that apply</p> | <p>checkbox</p> <table border="1"> <tr><td>1</td><td>pep_where__1</td><td>head</td></tr> <tr><td>2</td><td>pep_where__2</td><td>mouth</td></tr> <tr><td>3</td><td>pep_where__3</td><td>throat</td></tr> <tr><td>4</td><td>pep_where__4</td><td>neck</td></tr> <tr><td>5</td><td>pep_where__5</td><td>back</td></tr> <tr><td>6</td><td>pep_where__6</td><td>chest</td></tr> <tr><td>7</td><td>pep_where__7</td><td>armpits</td></tr> <tr><td>8</td><td>pep_where__8</td><td>breasts</td></tr> <tr><td>9</td><td>pep_where__9</td><td>stomach/abdomen</td></tr> <tr><td>10</td><td>pep_where__10</td><td>my port or PICC line</td></tr> <tr><td>11</td><td>pep_where__11</td><td>my arms or legs</td></tr> <tr><td>12</td><td>pep_where__12</td><td>other</td></tr> </table>                                                             | 1 | pep_where__1        | head                  | 2 | pep_where__2        | mouth             | 3 | pep_where__3        | throat        | 4 | pep_where__4        | neck                | 5 | pep_where__5        | back                                                      | 6 | pep_where__6        | chest                                          | 7 | pep_where__7        | armpits                          | 8 | pep_where__8        | breasts | 9 | pep_where__9        | stomach/abdomen | 10 | pep_where__10      | my port or PICC line | 11 | pep_where__11      | my arms or legs | 12 | pep_where__12      | other |
| 1  | pep_where__1                                                                                                                                                      | head                                                                                                                                              |                                                                                                                                                                                                                                                                                                                                                                                                                                                                                                                                                                                                                                                                                                                                                                                                                                        |   |                     |                       |   |                     |                   |   |                     |               |   |                     |                     |   |                     |                                                           |   |                     |                                                |   |                     |                                  |   |                     |         |   |                     |                 |    |                    |                      |    |                    |                 |    |                    |       |
| 2  | pep_where__2                                                                                                                                                      | mouth                                                                                                                                             |                                                                                                                                                                                                                                                                                                                                                                                                                                                                                                                                                                                                                                                                                                                                                                                                                                        |   |                     |                       |   |                     |                   |   |                     |               |   |                     |                     |   |                     |                                                           |   |                     |                                                |   |                     |                                  |   |                     |         |   |                     |                 |    |                    |                      |    |                    |                 |    |                    |       |
| 3  | pep_where__3                                                                                                                                                      | throat                                                                                                                                            |                                                                                                                                                                                                                                                                                                                                                                                                                                                                                                                                                                                                                                                                                                                                                                                                                                        |   |                     |                       |   |                     |                   |   |                     |               |   |                     |                     |   |                     |                                                           |   |                     |                                                |   |                     |                                  |   |                     |         |   |                     |                 |    |                    |                      |    |                    |                 |    |                    |       |
| 4  | pep_where__4                                                                                                                                                      | neck                                                                                                                                              |                                                                                                                                                                                                                                                                                                                                                                                                                                                                                                                                                                                                                                                                                                                                                                                                                                        |   |                     |                       |   |                     |                   |   |                     |               |   |                     |                     |   |                     |                                                           |   |                     |                                                |   |                     |                                  |   |                     |         |   |                     |                 |    |                    |                      |    |                    |                 |    |                    |       |
| 5  | pep_where__5                                                                                                                                                      | back                                                                                                                                              |                                                                                                                                                                                                                                                                                                                                                                                                                                                                                                                                                                                                                                                                                                                                                                                                                                        |   |                     |                       |   |                     |                   |   |                     |               |   |                     |                     |   |                     |                                                           |   |                     |                                                |   |                     |                                  |   |                     |         |   |                     |                 |    |                    |                      |    |                    |                 |    |                    |       |
| 6  | pep_where__6                                                                                                                                                      | chest                                                                                                                                             |                                                                                                                                                                                                                                                                                                                                                                                                                                                                                                                                                                                                                                                                                                                                                                                                                                        |   |                     |                       |   |                     |                   |   |                     |               |   |                     |                     |   |                     |                                                           |   |                     |                                                |   |                     |                                  |   |                     |         |   |                     |                 |    |                    |                      |    |                    |                 |    |                    |       |
| 7  | pep_where__7                                                                                                                                                      | armpits                                                                                                                                           |                                                                                                                                                                                                                                                                                                                                                                                                                                                                                                                                                                                                                                                                                                                                                                                                                                        |   |                     |                       |   |                     |                   |   |                     |               |   |                     |                     |   |                     |                                                           |   |                     |                                                |   |                     |                                  |   |                     |         |   |                     |                 |    |                    |                      |    |                    |                 |    |                    |       |
| 8  | pep_where__8                                                                                                                                                      | breasts                                                                                                                                           |                                                                                                                                                                                                                                                                                                                                                                                                                                                                                                                                                                                                                                                                                                                                                                                                                                        |   |                     |                       |   |                     |                   |   |                     |               |   |                     |                     |   |                     |                                                           |   |                     |                                                |   |                     |                                  |   |                     |         |   |                     |                 |    |                    |                      |    |                    |                 |    |                    |       |
| 9  | pep_where__9                                                                                                                                                      | stomach/abdomen                                                                                                                                   |                                                                                                                                                                                                                                                                                                                                                                                                                                                                                                                                                                                                                                                                                                                                                                                                                                        |   |                     |                       |   |                     |                   |   |                     |               |   |                     |                     |   |                     |                                                           |   |                     |                                                |   |                     |                                  |   |                     |         |   |                     |                 |    |                    |                      |    |                    |                 |    |                    |       |
| 10 | pep_where__10                                                                                                                                                     | my port or PICC line                                                                                                                              |                                                                                                                                                                                                                                                                                                                                                                                                                                                                                                                                                                                                                                                                                                                                                                                                                                        |   |                     |                       |   |                     |                   |   |                     |               |   |                     |                     |   |                     |                                                           |   |                     |                                                |   |                     |                                  |   |                     |         |   |                     |                 |    |                    |                      |    |                    |                 |    |                    |       |
| 11 | pep_where__11                                                                                                                                                     | my arms or legs                                                                                                                                   |                                                                                                                                                                                                                                                                                                                                                                                                                                                                                                                                                                                                                                                                                                                                                                                                                                        |   |                     |                       |   |                     |                   |   |                     |               |   |                     |                     |   |                     |                                                           |   |                     |                                                |   |                     |                                  |   |                     |         |   |                     |                 |    |                    |                      |    |                    |                 |    |                    |       |
| 12 | pep_where__12                                                                                                                                                     | other                                                                                                                                             |                                                                                                                                                                                                                                                                                                                                                                                                                                                                                                                                                                                                                                                                                                                                                                                                                                        |   |                     |                       |   |                     |                   |   |                     |               |   |                     |                     |   |                     |                                                           |   |                     |                                                |   |                     |                                  |   |                     |         |   |                     |                 |    |                    |                      |    |                    |                 |    |                    |       |
| 42 | <p>[ <b>exercise_dislike</b> ]</p> <p>Show the field ONLY if:<br/>[ever_used(5)] = '1'</p>                                                                        | <p>What do you DISLIKE about Vigorous Aerobic Exercise?</p> <p>Select ALL that apply</p>                                                          | <p>checkbox</p> <table border="1"> <tr><td>1</td><td>exercise_dislike__1</td><td>I get short of breath</td></tr> <tr><td>2</td><td>exercise_dislike__2</td><td>It takes too long</td></tr> <tr><td>3</td><td>exercise_dislike__3</td><td>It is painful</td></tr> <tr><td>4</td><td>exercise_dislike__4</td><td>It is uncomfortable</td></tr> <tr><td>5</td><td>exercise_dislike__5</td><td>It is less effective than other forms of airway clearance</td></tr> <tr><td>6</td><td>exercise_dislike__6</td><td>It does not work well with my other treatments</td></tr> <tr><td>7</td><td>exercise_dislike__7</td><td>It is unpleasant or embarrassing</td></tr> <tr><td>8</td><td>exercise_dislike__8</td><td>Nothing</td></tr> <tr><td>9</td><td>exercise_dislike__9</td><td>I don't know</td></tr> </table>                           | 1 | exercise_dislike__1 | I get short of breath | 2 | exercise_dislike__2 | It takes too long | 3 | exercise_dislike__3 | It is painful | 4 | exercise_dislike__4 | It is uncomfortable | 5 | exercise_dislike__5 | It is less effective than other forms of airway clearance | 6 | exercise_dislike__6 | It does not work well with my other treatments | 7 | exercise_dislike__7 | It is unpleasant or embarrassing | 8 | exercise_dislike__8 | Nothing | 9 | exercise_dislike__9 | I don't know    |    |                    |                      |    |                    |                 |    |                    |       |
| 1  | exercise_dislike__1                                                                                                                                               | I get short of breath                                                                                                                             |                                                                                                                                                                                                                                                                                                                                                                                                                                                                                                                                                                                                                                                                                                                                                                                                                                        |   |                     |                       |   |                     |                   |   |                     |               |   |                     |                     |   |                     |                                                           |   |                     |                                                |   |                     |                                  |   |                     |         |   |                     |                 |    |                    |                      |    |                    |                 |    |                    |       |
| 2  | exercise_dislike__2                                                                                                                                               | It takes too long                                                                                                                                 |                                                                                                                                                                                                                                                                                                                                                                                                                                                                                                                                                                                                                                                                                                                                                                                                                                        |   |                     |                       |   |                     |                   |   |                     |               |   |                     |                     |   |                     |                                                           |   |                     |                                                |   |                     |                                  |   |                     |         |   |                     |                 |    |                    |                      |    |                    |                 |    |                    |       |
| 3  | exercise_dislike__3                                                                                                                                               | It is painful                                                                                                                                     |                                                                                                                                                                                                                                                                                                                                                                                                                                                                                                                                                                                                                                                                                                                                                                                                                                        |   |                     |                       |   |                     |                   |   |                     |               |   |                     |                     |   |                     |                                                           |   |                     |                                                |   |                     |                                  |   |                     |         |   |                     |                 |    |                    |                      |    |                    |                 |    |                    |       |
| 4  | exercise_dislike__4                                                                                                                                               | It is uncomfortable                                                                                                                               |                                                                                                                                                                                                                                                                                                                                                                                                                                                                                                                                                                                                                                                                                                                                                                                                                                        |   |                     |                       |   |                     |                   |   |                     |               |   |                     |                     |   |                     |                                                           |   |                     |                                                |   |                     |                                  |   |                     |         |   |                     |                 |    |                    |                      |    |                    |                 |    |                    |       |
| 5  | exercise_dislike__5                                                                                                                                               | It is less effective than other forms of airway clearance                                                                                         |                                                                                                                                                                                                                                                                                                                                                                                                                                                                                                                                                                                                                                                                                                                                                                                                                                        |   |                     |                       |   |                     |                   |   |                     |               |   |                     |                     |   |                     |                                                           |   |                     |                                                |   |                     |                                  |   |                     |         |   |                     |                 |    |                    |                      |    |                    |                 |    |                    |       |
| 6  | exercise_dislike__6                                                                                                                                               | It does not work well with my other treatments                                                                                                    |                                                                                                                                                                                                                                                                                                                                                                                                                                                                                                                                                                                                                                                                                                                                                                                                                                        |   |                     |                       |   |                     |                   |   |                     |               |   |                     |                     |   |                     |                                                           |   |                     |                                                |   |                     |                                  |   |                     |         |   |                     |                 |    |                    |                      |    |                    |                 |    |                    |       |
| 7  | exercise_dislike__7                                                                                                                                               | It is unpleasant or embarrassing                                                                                                                  |                                                                                                                                                                                                                                                                                                                                                                                                                                                                                                                                                                                                                                                                                                                                                                                                                                        |   |                     |                       |   |                     |                   |   |                     |               |   |                     |                     |   |                     |                                                           |   |                     |                                                |   |                     |                                  |   |                     |         |   |                     |                 |    |                    |                      |    |                    |                 |    |                    |       |
| 8  | exercise_dislike__8                                                                                                                                               | Nothing                                                                                                                                           |                                                                                                                                                                                                                                                                                                                                                                                                                                                                                                                                                                                                                                                                                                                                                                                                                                        |   |                     |                       |   |                     |                   |   |                     |               |   |                     |                     |   |                     |                                                           |   |                     |                                                |   |                     |                                  |   |                     |         |   |                     |                 |    |                    |                      |    |                    |                 |    |                    |       |
| 9  | exercise_dislike__9                                                                                                                                               | I don't know                                                                                                                                      |                                                                                                                                                                                                                                                                                                                                                                                                                                                                                                                                                                                                                                                                                                                                                                                                                                        |   |                     |                       |   |                     |                   |   |                     |               |   |                     |                     |   |                     |                                                           |   |                     |                                                |   |                     |                                  |   |                     |         |   |                     |                 |    |                    |                      |    |                    |                 |    |                    |       |
| 43 | <p>[ <b>exercise_follow_up</b> ]</p> <p>Show the field ONLY if:<br/>[exercise_dislike(3)] = '1' or [exercise_dislike(4)] = '1' or [exercise_dislike(7)] = '1'</p> | <p>Why is Vigorous Aerobic Exercise painful, uncomfortable or unpleasant?</p>                                                                     | <p>text</p>                                                                                                                                                                                                                                                                                                                                                                                                                                                                                                                                                                                                                                                                                                                                                                                                                            |   |                     |                       |   |                     |                   |   |                     |               |   |                     |                     |   |                     |                                                           |   |                     |                                                |   |                     |                                  |   |                     |         |   |                     |                 |    |                    |                      |    |                    |                 |    |                    |       |
| 44 | <p>[ <b>exercise_where</b> ]</p> <p>Show the field ONLY if:<br/>[exercise_dislike(3)] = '1' or [exercise_dislike(4)] = '1' or [exercise_dislike(7)] = '1'</p>     | <p>Where on your body does Vigorous Aerobic Exercise bother you?</p> <p>Select ALL that apply</p>                                                 | <p>checkbox</p> <table border="1"> <tr><td>1</td><td>exercise_where__1</td><td>head</td></tr> <tr><td>2</td><td>exercise_where__2</td><td>mouth</td></tr> <tr><td>3</td><td>exercise_where__3</td><td>throat</td></tr> <tr><td>4</td><td>exercise_where__4</td><td>neck</td></tr> <tr><td>5</td><td>exercise_where__5</td><td>back</td></tr> <tr><td>6</td><td>exercise_where__6</td><td>chest</td></tr> <tr><td>7</td><td>exercise_where__7</td><td>armpits</td></tr> <tr><td>8</td><td>exercise_where__8</td><td>breasts</td></tr> <tr><td>9</td><td>exercise_where__9</td><td>stomach/abdomen</td></tr> <tr><td>10</td><td>exercise_where__10</td><td>my port or PICC line</td></tr> <tr><td>11</td><td>exercise_where__11</td><td>my arms or legs</td></tr> <tr><td>12</td><td>exercise_where__12</td><td>other</td></tr> </table> | 1 | exercise_where__1   | head                  | 2 | exercise_where__2   | mouth             | 3 | exercise_where__3   | throat        | 4 | exercise_where__4   | neck                | 5 | exercise_where__5   | back                                                      | 6 | exercise_where__6   | chest                                          | 7 | exercise_where__7   | armpits                          | 8 | exercise_where__8   | breasts | 9 | exercise_where__9   | stomach/abdomen | 10 | exercise_where__10 | my port or PICC line | 11 | exercise_where__11 | my arms or legs | 12 | exercise_where__12 | other |
| 1  | exercise_where__1                                                                                                                                                 | head                                                                                                                                              |                                                                                                                                                                                                                                                                                                                                                                                                                                                                                                                                                                                                                                                                                                                                                                                                                                        |   |                     |                       |   |                     |                   |   |                     |               |   |                     |                     |   |                     |                                                           |   |                     |                                                |   |                     |                                  |   |                     |         |   |                     |                 |    |                    |                      |    |                    |                 |    |                    |       |
| 2  | exercise_where__2                                                                                                                                                 | mouth                                                                                                                                             |                                                                                                                                                                                                                                                                                                                                                                                                                                                                                                                                                                                                                                                                                                                                                                                                                                        |   |                     |                       |   |                     |                   |   |                     |               |   |                     |                     |   |                     |                                                           |   |                     |                                                |   |                     |                                  |   |                     |         |   |                     |                 |    |                    |                      |    |                    |                 |    |                    |       |
| 3  | exercise_where__3                                                                                                                                                 | throat                                                                                                                                            |                                                                                                                                                                                                                                                                                                                                                                                                                                                                                                                                                                                                                                                                                                                                                                                                                                        |   |                     |                       |   |                     |                   |   |                     |               |   |                     |                     |   |                     |                                                           |   |                     |                                                |   |                     |                                  |   |                     |         |   |                     |                 |    |                    |                      |    |                    |                 |    |                    |       |
| 4  | exercise_where__4                                                                                                                                                 | neck                                                                                                                                              |                                                                                                                                                                                                                                                                                                                                                                                                                                                                                                                                                                                                                                                                                                                                                                                                                                        |   |                     |                       |   |                     |                   |   |                     |               |   |                     |                     |   |                     |                                                           |   |                     |                                                |   |                     |                                  |   |                     |         |   |                     |                 |    |                    |                      |    |                    |                 |    |                    |       |
| 5  | exercise_where__5                                                                                                                                                 | back                                                                                                                                              |                                                                                                                                                                                                                                                                                                                                                                                                                                                                                                                                                                                                                                                                                                                                                                                                                                        |   |                     |                       |   |                     |                   |   |                     |               |   |                     |                     |   |                     |                                                           |   |                     |                                                |   |                     |                                  |   |                     |         |   |                     |                 |    |                    |                      |    |                    |                 |    |                    |       |
| 6  | exercise_where__6                                                                                                                                                 | chest                                                                                                                                             |                                                                                                                                                                                                                                                                                                                                                                                                                                                                                                                                                                                                                                                                                                                                                                                                                                        |   |                     |                       |   |                     |                   |   |                     |               |   |                     |                     |   |                     |                                                           |   |                     |                                                |   |                     |                                  |   |                     |         |   |                     |                 |    |                    |                      |    |                    |                 |    |                    |       |
| 7  | exercise_where__7                                                                                                                                                 | armpits                                                                                                                                           |                                                                                                                                                                                                                                                                                                                                                                                                                                                                                                                                                                                                                                                                                                                                                                                                                                        |   |                     |                       |   |                     |                   |   |                     |               |   |                     |                     |   |                     |                                                           |   |                     |                                                |   |                     |                                  |   |                     |         |   |                     |                 |    |                    |                      |    |                    |                 |    |                    |       |
| 8  | exercise_where__8                                                                                                                                                 | breasts                                                                                                                                           |                                                                                                                                                                                                                                                                                                                                                                                                                                                                                                                                                                                                                                                                                                                                                                                                                                        |   |                     |                       |   |                     |                   |   |                     |               |   |                     |                     |   |                     |                                                           |   |                     |                                                |   |                     |                                  |   |                     |         |   |                     |                 |    |                    |                      |    |                    |                 |    |                    |       |
| 9  | exercise_where__9                                                                                                                                                 | stomach/abdomen                                                                                                                                   |                                                                                                                                                                                                                                                                                                                                                                                                                                                                                                                                                                                                                                                                                                                                                                                                                                        |   |                     |                       |   |                     |                   |   |                     |               |   |                     |                     |   |                     |                                                           |   |                     |                                                |   |                     |                                  |   |                     |         |   |                     |                 |    |                    |                      |    |                    |                 |    |                    |       |
| 10 | exercise_where__10                                                                                                                                                | my port or PICC line                                                                                                                              |                                                                                                                                                                                                                                                                                                                                                                                                                                                                                                                                                                                                                                                                                                                                                                                                                                        |   |                     |                       |   |                     |                   |   |                     |               |   |                     |                     |   |                     |                                                           |   |                     |                                                |   |                     |                                  |   |                     |         |   |                     |                 |    |                    |                      |    |                    |                 |    |                    |       |
| 11 | exercise_where__11                                                                                                                                                | my arms or legs                                                                                                                                   |                                                                                                                                                                                                                                                                                                                                                                                                                                                                                                                                                                                                                                                                                                                                                                                                                                        |   |                     |                       |   |                     |                   |   |                     |               |   |                     |                     |   |                     |                                                           |   |                     |                                                |   |                     |                                  |   |                     |         |   |                     |                 |    |                    |                      |    |                    |                 |    |                    |       |
| 12 | exercise_where__12                                                                                                                                                | other                                                                                                                                             |                                                                                                                                                                                                                                                                                                                                                                                                                                                                                                                                                                                                                                                                                                                                                                                                                                        |   |                     |                       |   |                     |                   |   |                     |               |   |                     |                     |   |                     |                                                           |   |                     |                                                |   |                     |                                  |   |                     |         |   |                     |                 |    |                    |                      |    |                    |                 |    |                    |       |



|    |                                                                                                                                                            |                                                                                                                                    |                                                                                                                                                                                                                                                                                                                                                                                                                                                                                                                                                                                                                                                                                                                                                                                                                                                                                                         |   |                        |                                                                        |                                |                        |                                                                                          |   |                        |                                                                        |   |                        |                     |   |                       |                                                           |   |                       |                                                |   |                       |                                  |   |                       |         |   |                       |                 |    |                      |                      |    |                      |                 |    |                      |       |
|----|------------------------------------------------------------------------------------------------------------------------------------------------------------|------------------------------------------------------------------------------------------------------------------------------------|---------------------------------------------------------------------------------------------------------------------------------------------------------------------------------------------------------------------------------------------------------------------------------------------------------------------------------------------------------------------------------------------------------------------------------------------------------------------------------------------------------------------------------------------------------------------------------------------------------------------------------------------------------------------------------------------------------------------------------------------------------------------------------------------------------------------------------------------------------------------------------------------------------|---|------------------------|------------------------------------------------------------------------|--------------------------------|------------------------|------------------------------------------------------------------------------------------|---|------------------------|------------------------------------------------------------------------|---|------------------------|---------------------|---|-----------------------|-----------------------------------------------------------|---|-----------------------|------------------------------------------------|---|-----------------------|----------------------------------|---|-----------------------|---------|---|-----------------------|-----------------|----|----------------------|----------------------|----|----------------------|-----------------|----|----------------------|-------|
| 45 | [huff_cough_dislike]<br>Show the field ONLY if:<br>[ever_used(6)] = '1'                                                                                    | What do you DISLIKE about Huff Coughing?<br>Select ALL that apply                                                                  | checkbox <table border="1"> <tr> <td>1</td> <td>huff_cough_dislike__1</td> <td>I get short of breath</td> </tr> <tr> <td>2</td> <td>huff_cough_dislike__2</td> <td>It takes too long</td> </tr> <tr> <td>3</td> <td>huff_cough_dislike__3</td> <td>It is painful</td> </tr> <tr> <td>4</td> <td>huff_cough_dislike__4</td> <td>It is uncomfortable</td> </tr> <tr> <td>5</td> <td>huff_cough_dislike__5</td> <td>It is less effective than other forms of airway clearance</td> </tr> <tr> <td>6</td> <td>huff_cough_dislike__6</td> <td>It does not work well with my other treatments</td> </tr> <tr> <td>7</td> <td>huff_cough_dislike__7</td> <td>It is unpleasant or embarrassing</td> </tr> <tr> <td>8</td> <td>huff_cough_dislike__8</td> <td>Nothing</td> </tr> <tr> <td>9</td> <td>huff_cough_dislike__9</td> <td>I don't know</td> </tr> </table>                                             | 1 | huff_cough_dislike__1  | I get short of breath                                                  | 2                              | huff_cough_dislike__2  | It takes too long                                                                        | 3 | huff_cough_dislike__3  | It is painful                                                          | 4 | huff_cough_dislike__4  | It is uncomfortable | 5 | huff_cough_dislike__5 | It is less effective than other forms of airway clearance | 6 | huff_cough_dislike__6 | It does not work well with my other treatments | 7 | huff_cough_dislike__7 | It is unpleasant or embarrassing | 8 | huff_cough_dislike__8 | Nothing | 9 | huff_cough_dislike__9 | I don't know    |    |                      |                      |    |                      |                 |    |                      |       |
| 1  | huff_cough_dislike__1                                                                                                                                      | I get short of breath                                                                                                              |                                                                                                                                                                                                                                                                                                                                                                                                                                                                                                                                                                                                                                                                                                                                                                                                                                                                                                         |   |                        |                                                                        |                                |                        |                                                                                          |   |                        |                                                                        |   |                        |                     |   |                       |                                                           |   |                       |                                                |   |                       |                                  |   |                       |         |   |                       |                 |    |                      |                      |    |                      |                 |    |                      |       |
| 2  | huff_cough_dislike__2                                                                                                                                      | It takes too long                                                                                                                  |                                                                                                                                                                                                                                                                                                                                                                                                                                                                                                                                                                                                                                                                                                                                                                                                                                                                                                         |   |                        |                                                                        |                                |                        |                                                                                          |   |                        |                                                                        |   |                        |                     |   |                       |                                                           |   |                       |                                                |   |                       |                                  |   |                       |         |   |                       |                 |    |                      |                      |    |                      |                 |    |                      |       |
| 3  | huff_cough_dislike__3                                                                                                                                      | It is painful                                                                                                                      |                                                                                                                                                                                                                                                                                                                                                                                                                                                                                                                                                                                                                                                                                                                                                                                                                                                                                                         |   |                        |                                                                        |                                |                        |                                                                                          |   |                        |                                                                        |   |                        |                     |   |                       |                                                           |   |                       |                                                |   |                       |                                  |   |                       |         |   |                       |                 |    |                      |                      |    |                      |                 |    |                      |       |
| 4  | huff_cough_dislike__4                                                                                                                                      | It is uncomfortable                                                                                                                |                                                                                                                                                                                                                                                                                                                                                                                                                                                                                                                                                                                                                                                                                                                                                                                                                                                                                                         |   |                        |                                                                        |                                |                        |                                                                                          |   |                        |                                                                        |   |                        |                     |   |                       |                                                           |   |                       |                                                |   |                       |                                  |   |                       |         |   |                       |                 |    |                      |                      |    |                      |                 |    |                      |       |
| 5  | huff_cough_dislike__5                                                                                                                                      | It is less effective than other forms of airway clearance                                                                          |                                                                                                                                                                                                                                                                                                                                                                                                                                                                                                                                                                                                                                                                                                                                                                                                                                                                                                         |   |                        |                                                                        |                                |                        |                                                                                          |   |                        |                                                                        |   |                        |                     |   |                       |                                                           |   |                       |                                                |   |                       |                                  |   |                       |         |   |                       |                 |    |                      |                      |    |                      |                 |    |                      |       |
| 6  | huff_cough_dislike__6                                                                                                                                      | It does not work well with my other treatments                                                                                     |                                                                                                                                                                                                                                                                                                                                                                                                                                                                                                                                                                                                                                                                                                                                                                                                                                                                                                         |   |                        |                                                                        |                                |                        |                                                                                          |   |                        |                                                                        |   |                        |                     |   |                       |                                                           |   |                       |                                                |   |                       |                                  |   |                       |         |   |                       |                 |    |                      |                      |    |                      |                 |    |                      |       |
| 7  | huff_cough_dislike__7                                                                                                                                      | It is unpleasant or embarrassing                                                                                                   |                                                                                                                                                                                                                                                                                                                                                                                                                                                                                                                                                                                                                                                                                                                                                                                                                                                                                                         |   |                        |                                                                        |                                |                        |                                                                                          |   |                        |                                                                        |   |                        |                     |   |                       |                                                           |   |                       |                                                |   |                       |                                  |   |                       |         |   |                       |                 |    |                      |                      |    |                      |                 |    |                      |       |
| 8  | huff_cough_dislike__8                                                                                                                                      | Nothing                                                                                                                            |                                                                                                                                                                                                                                                                                                                                                                                                                                                                                                                                                                                                                                                                                                                                                                                                                                                                                                         |   |                        |                                                                        |                                |                        |                                                                                          |   |                        |                                                                        |   |                        |                     |   |                       |                                                           |   |                       |                                                |   |                       |                                  |   |                       |         |   |                       |                 |    |                      |                      |    |                      |                 |    |                      |       |
| 9  | huff_cough_dislike__9                                                                                                                                      | I don't know                                                                                                                       |                                                                                                                                                                                                                                                                                                                                                                                                                                                                                                                                                                                                                                                                                                                                                                                                                                                                                                         |   |                        |                                                                        |                                |                        |                                                                                          |   |                        |                                                                        |   |                        |                     |   |                       |                                                           |   |                       |                                                |   |                       |                                  |   |                       |         |   |                       |                 |    |                      |                      |    |                      |                 |    |                      |       |
| 46 | [huff_cough_follow_up]<br>Show the field ONLY if:<br>[huff_cough_dislike(3)] = '1' or<br>[huff_cough_dislike(4)] = '1' or<br>[huff_cough_dislike(7)] = '1' | Why is Huff Coughing painful, uncomfortable or unpleasant?                                                                         | text                                                                                                                                                                                                                                                                                                                                                                                                                                                                                                                                                                                                                                                                                                                                                                                                                                                                                                    |   |                        |                                                                        |                                |                        |                                                                                          |   |                        |                                                                        |   |                        |                     |   |                       |                                                           |   |                       |                                                |   |                       |                                  |   |                       |         |   |                       |                 |    |                      |                      |    |                      |                 |    |                      |       |
| 47 | [huff_cough_where]<br>Show the field ONLY if:<br>[huff_cough_dislike(3)] = '1' or<br>[huff_cough_dislike(4)] = '1' or<br>[huff_cough_dislike(7)] = '1'     | Where on your body does Huff Coughing bother you?<br>Select ALL that apply                                                         | checkbox <table border="1"> <tr> <td>1</td> <td>huff_cough_where__1</td> <td>head</td> </tr> <tr> <td>2</td> <td>huff_cough_where__2</td> <td>mouth</td> </tr> <tr> <td>3</td> <td>huff_cough_where__3</td> <td>throat</td> </tr> <tr> <td>4</td> <td>huff_cough_where__4</td> <td>neck</td> </tr> <tr> <td>5</td> <td>huff_cough_where__5</td> <td>back</td> </tr> <tr> <td>6</td> <td>huff_cough_where__6</td> <td>chest</td> </tr> <tr> <td>7</td> <td>huff_cough_where__7</td> <td>armpits</td> </tr> <tr> <td>8</td> <td>huff_cough_where__8</td> <td>breasts</td> </tr> <tr> <td>9</td> <td>huff_cough_where__9</td> <td>stomach/abdomen</td> </tr> <tr> <td>10</td> <td>huff_cough_where__10</td> <td>my port or PICC line</td> </tr> <tr> <td>11</td> <td>huff_cough_where__11</td> <td>my arms or legs</td> </tr> <tr> <td>12</td> <td>huff_cough_where__12</td> <td>other</td> </tr> </table> | 1 | huff_cough_where__1    | head                                                                   | 2                              | huff_cough_where__2    | mouth                                                                                    | 3 | huff_cough_where__3    | throat                                                                 | 4 | huff_cough_where__4    | neck                | 5 | huff_cough_where__5   | back                                                      | 6 | huff_cough_where__6   | chest                                          | 7 | huff_cough_where__7   | armpits                          | 8 | huff_cough_where__8   | breasts | 9 | huff_cough_where__9   | stomach/abdomen | 10 | huff_cough_where__10 | my port or PICC line | 11 | huff_cough_where__11 | my arms or legs | 12 | huff_cough_where__12 | other |
| 1  | huff_cough_where__1                                                                                                                                        | head                                                                                                                               |                                                                                                                                                                                                                                                                                                                                                                                                                                                                                                                                                                                                                                                                                                                                                                                                                                                                                                         |   |                        |                                                                        |                                |                        |                                                                                          |   |                        |                                                                        |   |                        |                     |   |                       |                                                           |   |                       |                                                |   |                       |                                  |   |                       |         |   |                       |                 |    |                      |                      |    |                      |                 |    |                      |       |
| 2  | huff_cough_where__2                                                                                                                                        | mouth                                                                                                                              |                                                                                                                                                                                                                                                                                                                                                                                                                                                                                                                                                                                                                                                                                                                                                                                                                                                                                                         |   |                        |                                                                        |                                |                        |                                                                                          |   |                        |                                                                        |   |                        |                     |   |                       |                                                           |   |                       |                                                |   |                       |                                  |   |                       |         |   |                       |                 |    |                      |                      |    |                      |                 |    |                      |       |
| 3  | huff_cough_where__3                                                                                                                                        | throat                                                                                                                             |                                                                                                                                                                                                                                                                                                                                                                                                                                                                                                                                                                                                                                                                                                                                                                                                                                                                                                         |   |                        |                                                                        |                                |                        |                                                                                          |   |                        |                                                                        |   |                        |                     |   |                       |                                                           |   |                       |                                                |   |                       |                                  |   |                       |         |   |                       |                 |    |                      |                      |    |                      |                 |    |                      |       |
| 4  | huff_cough_where__4                                                                                                                                        | neck                                                                                                                               |                                                                                                                                                                                                                                                                                                                                                                                                                                                                                                                                                                                                                                                                                                                                                                                                                                                                                                         |   |                        |                                                                        |                                |                        |                                                                                          |   |                        |                                                                        |   |                        |                     |   |                       |                                                           |   |                       |                                                |   |                       |                                  |   |                       |         |   |                       |                 |    |                      |                      |    |                      |                 |    |                      |       |
| 5  | huff_cough_where__5                                                                                                                                        | back                                                                                                                               |                                                                                                                                                                                                                                                                                                                                                                                                                                                                                                                                                                                                                                                                                                                                                                                                                                                                                                         |   |                        |                                                                        |                                |                        |                                                                                          |   |                        |                                                                        |   |                        |                     |   |                       |                                                           |   |                       |                                                |   |                       |                                  |   |                       |         |   |                       |                 |    |                      |                      |    |                      |                 |    |                      |       |
| 6  | huff_cough_where__6                                                                                                                                        | chest                                                                                                                              |                                                                                                                                                                                                                                                                                                                                                                                                                                                                                                                                                                                                                                                                                                                                                                                                                                                                                                         |   |                        |                                                                        |                                |                        |                                                                                          |   |                        |                                                                        |   |                        |                     |   |                       |                                                           |   |                       |                                                |   |                       |                                  |   |                       |         |   |                       |                 |    |                      |                      |    |                      |                 |    |                      |       |
| 7  | huff_cough_where__7                                                                                                                                        | armpits                                                                                                                            |                                                                                                                                                                                                                                                                                                                                                                                                                                                                                                                                                                                                                                                                                                                                                                                                                                                                                                         |   |                        |                                                                        |                                |                        |                                                                                          |   |                        |                                                                        |   |                        |                     |   |                       |                                                           |   |                       |                                                |   |                       |                                  |   |                       |         |   |                       |                 |    |                      |                      |    |                      |                 |    |                      |       |
| 8  | huff_cough_where__8                                                                                                                                        | breasts                                                                                                                            |                                                                                                                                                                                                                                                                                                                                                                                                                                                                                                                                                                                                                                                                                                                                                                                                                                                                                                         |   |                        |                                                                        |                                |                        |                                                                                          |   |                        |                                                                        |   |                        |                     |   |                       |                                                           |   |                       |                                                |   |                       |                                  |   |                       |         |   |                       |                 |    |                      |                      |    |                      |                 |    |                      |       |
| 9  | huff_cough_where__9                                                                                                                                        | stomach/abdomen                                                                                                                    |                                                                                                                                                                                                                                                                                                                                                                                                                                                                                                                                                                                                                                                                                                                                                                                                                                                                                                         |   |                        |                                                                        |                                |                        |                                                                                          |   |                        |                                                                        |   |                        |                     |   |                       |                                                           |   |                       |                                                |   |                       |                                  |   |                       |         |   |                       |                 |    |                      |                      |    |                      |                 |    |                      |       |
| 10 | huff_cough_where__10                                                                                                                                       | my port or PICC line                                                                                                               |                                                                                                                                                                                                                                                                                                                                                                                                                                                                                                                                                                                                                                                                                                                                                                                                                                                                                                         |   |                        |                                                                        |                                |                        |                                                                                          |   |                        |                                                                        |   |                        |                     |   |                       |                                                           |   |                       |                                                |   |                       |                                  |   |                       |         |   |                       |                 |    |                      |                      |    |                      |                 |    |                      |       |
| 11 | huff_cough_where__11                                                                                                                                       | my arms or legs                                                                                                                    |                                                                                                                                                                                                                                                                                                                                                                                                                                                                                                                                                                                                                                                                                                                                                                                                                                                                                                         |   |                        |                                                                        |                                |                        |                                                                                          |   |                        |                                                                        |   |                        |                     |   |                       |                                                           |   |                       |                                                |   |                       |                                  |   |                       |         |   |                       |                 |    |                      |                      |    |                      |                 |    |                      |       |
| 12 | huff_cough_where__12                                                                                                                                       | other                                                                                                                              |                                                                                                                                                                                                                                                                                                                                                                                                                                                                                                                                                                                                                                                                                                                                                                                                                                                                                                         |   |                        |                                                                        |                                |                        |                                                                                          |   |                        |                                                                        |   |                        |                     |   |                       |                                                           |   |                       |                                                |   |                       |                                  |   |                       |         |   |                       |                 |    |                      |                      |    |                      |                 |    |                      |       |
| 48 | [treatments_maintain]                                                                                                                                      | Section Header: <i>My CF Treatments</i><br>Which treatments do you currently use to maintain your health?<br>Select ALL that apply | checkbox <table border="1"> <tr> <td>1</td> <td>treatments_maintain__1</td> <td>Inhaled Antibiotics: e.g. Tobramycin (TOBI), Aztreonam (Cayston), etc.</td> </tr> <tr> <td>2</td> <td>treatments_maintain__2</td> <td>Oral Antibiotics: e.g. Azithromycin, Augmentin, Bactrim, Cephalexin, Ciprofloxacin, etc.</td> </tr> <tr> <td>3</td> <td>treatments_maintain__3</td> <td>Mucus thinners: e.g. Hypertonic Saline, Dornase Alfa (Pulmozyme), etc.</td> </tr> <tr> <td>4</td> <td>treatments_maintain__4</td> <td>None of these</td> </tr> </table>                                                                                                                                                                                                                                                                                                                                                   | 1 | treatments_maintain__1 | Inhaled Antibiotics: e.g. Tobramycin (TOBI), Aztreonam (Cayston), etc. | 2                              | treatments_maintain__2 | Oral Antibiotics: e.g. Azithromycin, Augmentin, Bactrim, Cephalexin, Ciprofloxacin, etc. | 3 | treatments_maintain__3 | Mucus thinners: e.g. Hypertonic Saline, Dornase Alfa (Pulmozyme), etc. | 4 | treatments_maintain__4 | None of these       |   |                       |                                                           |   |                       |                                                |   |                       |                                  |   |                       |         |   |                       |                 |    |                      |                      |    |                      |                 |    |                      |       |
| 1  | treatments_maintain__1                                                                                                                                     | Inhaled Antibiotics: e.g. Tobramycin (TOBI), Aztreonam (Cayston), etc.                                                             |                                                                                                                                                                                                                                                                                                                                                                                                                                                                                                                                                                                                                                                                                                                                                                                                                                                                                                         |   |                        |                                                                        |                                |                        |                                                                                          |   |                        |                                                                        |   |                        |                     |   |                       |                                                           |   |                       |                                                |   |                       |                                  |   |                       |         |   |                       |                 |    |                      |                      |    |                      |                 |    |                      |       |
| 2  | treatments_maintain__2                                                                                                                                     | Oral Antibiotics: e.g. Azithromycin, Augmentin, Bactrim, Cephalexin, Ciprofloxacin, etc.                                           |                                                                                                                                                                                                                                                                                                                                                                                                                                                                                                                                                                                                                                                                                                                                                                                                                                                                                                         |   |                        |                                                                        |                                |                        |                                                                                          |   |                        |                                                                        |   |                        |                     |   |                       |                                                           |   |                       |                                                |   |                       |                                  |   |                       |         |   |                       |                 |    |                      |                      |    |                      |                 |    |                      |       |
| 3  | treatments_maintain__3                                                                                                                                     | Mucus thinners: e.g. Hypertonic Saline, Dornase Alfa (Pulmozyme), etc.                                                             |                                                                                                                                                                                                                                                                                                                                                                                                                                                                                                                                                                                                                                                                                                                                                                                                                                                                                                         |   |                        |                                                                        |                                |                        |                                                                                          |   |                        |                                                                        |   |                        |                     |   |                       |                                                           |   |                       |                                                |   |                       |                                  |   |                       |         |   |                       |                 |    |                      |                      |    |                      |                 |    |                      |       |
| 4  | treatments_maintain__4                                                                                                                                     | None of these                                                                                                                      |                                                                                                                                                                                                                                                                                                                                                                                                                                                                                                                                                                                                                                                                                                                                                                                                                                                                                                         |   |                        |                                                                        |                                |                        |                                                                                          |   |                        |                                                                        |   |                        |                     |   |                       |                                                           |   |                       |                                                |   |                       |                                  |   |                       |         |   |                       |                 |    |                      |                      |    |                      |                 |    |                      |       |
| 49 | [pt_effects]                                                                                                                                               | How does airway clearance affect your health?                                                                                      | radio <table border="1"> <tr> <td>1</td> <td>It improves it</td> </tr> <tr> <td>2</td> <td>It does not change / no effect</td> </tr> <tr> <td>3</td> <td>It worsens it</td> </tr> </table>                                                                                                                                                                                                                                                                                                                                                                                                                                                                                                                                                                                                                                                                                                              | 1 | It improves it         | 2                                                                      | It does not change / no effect | 3                      | It worsens it                                                                            |   |                        |                                                                        |   |                        |                     |   |                       |                                                           |   |                       |                                                |   |                       |                                  |   |                       |         |   |                       |                 |    |                      |                      |    |                      |                 |    |                      |       |
| 1  | It improves it                                                                                                                                             |                                                                                                                                    |                                                                                                                                                                                                                                                                                                                                                                                                                                                                                                                                                                                                                                                                                                                                                                                                                                                                                                         |   |                        |                                                                        |                                |                        |                                                                                          |   |                        |                                                                        |   |                        |                     |   |                       |                                                           |   |                       |                                                |   |                       |                                  |   |                       |         |   |                       |                 |    |                      |                      |    |                      |                 |    |                      |       |
| 2  | It does not change / no effect                                                                                                                             |                                                                                                                                    |                                                                                                                                                                                                                                                                                                                                                                                                                                                                                                                                                                                                                                                                                                                                                                                                                                                                                                         |   |                        |                                                                        |                                |                        |                                                                                          |   |                        |                                                                        |   |                        |                     |   |                       |                                                           |   |                       |                                                |   |                       |                                  |   |                       |         |   |                       |                 |    |                      |                      |    |                      |                 |    |                      |       |
| 3  | It worsens it                                                                                                                                              |                                                                                                                                    |                                                                                                                                                                                                                                                                                                                                                                                                                                                                                                                                                                                                                                                                                                                                                                                                                                                                                                         |   |                        |                                                                        |                                |                        |                                                                                          |   |                        |                                                                        |   |                        |                     |   |                       |                                                           |   |                       |                                                |   |                       |                                  |   |                       |         |   |                       |                 |    |                      |                      |    |                      |                 |    |                      |       |

|    |                                                                                                                                                                                  |                                                                                                                                                                   |                                                                                                                                                                             |
|----|----------------------------------------------------------------------------------------------------------------------------------------------------------------------------------|-------------------------------------------------------------------------------------------------------------------------------------------------------------------|-----------------------------------------------------------------------------------------------------------------------------------------------------------------------------|
| 50 | [theratype]                                                                                                                                                                      | Do you currently take any of these medications?                                                                                                                   | radio<br>1 ivacaftor (kalydeco)<br>2 lumacaftor/ivacaftor (orkambi)<br>3 tezacaftor/ivacaftor (symdeko)<br>4 elexacaftor/tezacaftor/ivacaftor (trikafta)<br>5 None of these |
| 51 | [clearance_perform1]<br>Show the field ONLY if:<br>[theratype] = '1'                                                                                                             | Which statement best describes your current airway clearance use since starting ivacaftor (kalydeco)?                                                             | radio<br>1 I perform more airway clearance now<br>2 I perform the same amount of airway clearance now<br>3 I perform less airway clearance now                              |
| 52 | [clearance_perform2]<br>Show the field ONLY if:<br>[theratype] = '2'                                                                                                             | Which statement best describes your current airway clearance use since starting lumacaftor/ivacaftor (orkambi)?                                                   | radio<br>1 I perform more airway clearance now<br>2 I perform the same amount of airway clearance now<br>3 I perform less airway clearance now                              |
| 53 | [clearance_perform3]<br>Show the field ONLY if:<br>[theratype] = '3'                                                                                                             | Which statement best describes your current airway clearance use since starting tezacaftor/ivacaftor (symdeko)?                                                   | radio<br>1 I perform more airway clearance now<br>2 I perform the same amount of airway clearance now<br>3 I perform less airway clearance now                              |
| 54 | [clearance_perform4]<br>Show the field ONLY if:<br>[theratype] = '4'                                                                                                             | Which statement best describes your current airway clearance use since starting elexacaftor/tezacaftor/ivacaftor (trikafta)?                                      | radio<br>1 I perform more airway clearance now<br>2 I perform the same amount of airway clearance now<br>3 I perform less airway clearance now                              |
| 55 | [mod_clearance_more]<br>Show the field ONLY if:<br>[clearance_perform1] = '1' or<br>[clearance_perform2] = '1' or<br>[clearance_perform3] = '1' or<br>[clearance_perform4] = '1' | Why do you perform more airway clearance now?                                                                                                                     | notes                                                                                                                                                                       |
| 56 | [mod_clearance_same]<br>Show the field ONLY if:<br>[clearance_perform1] = '2' or<br>[clearance_perform2] = '2' or<br>[clearance_perform3] = '2' or<br>[clearance_perform4] = '2' | Why do you perform the same amount of airway clearance now as you did prior to starting your modulator?                                                           | notes                                                                                                                                                                       |
| 57 | [mod_clearance_less]<br>Show the field ONLY if:<br>[clearance_perform1] = '3' or<br>[clearance_perform2] = '3' or<br>[clearance_perform3] = '3' or<br>[clearance_perform4] = '3' | Why do you perform less airway clearance now?                                                                                                                     | notes                                                                                                                                                                       |
| 58 | [ranking_modulators]<br>Show the field ONLY if:<br>[theratype] = '1' or [theratyp<br>e] = '2' or [theratype] = '3' or<br>[theratype] = '4'                                       | Section Header: Please indicate how important each of the following are for maintaining your health:<br>CFTR Modulators<br>Kalydeco, Orkambi, Symdeko or Trikafta | slider<br>Slider labels: Least Important, , Most Important<br>Custom alignment: RH                                                                                          |
| 59 | [ranking_inhaled_anti]<br>Show the field ONLY if:<br>[treatments_maintain(1)] = '1'                                                                                              | Inhaled Antibiotics<br>e.g. Tobramycin (TOBI), Aztreonam (Cayston), etc.                                                                                          | slider<br>Slider labels: Least Important, , Most Important<br>Custom alignment: RH                                                                                          |
| 60 | [ranking_oral_anti]<br>Show the field ONLY if:<br>[treatments_maintain(2)] = '1'                                                                                                 | Oral Antibiotics<br>e.g. Azithromycin, Augmentin, Bactrim, Cephalexin, Ciprofloxacin, etc.                                                                        | slider<br>Slider labels: Least Important, , Most Important<br>Custom alignment: RH                                                                                          |

|    |                                                                                                      |                                                                                               |                                                                                                                                                                                                                                                                                                                                                                                                                                                                                                                                                                                                        |   |                      |                                  |                                       |          |                                 |   |                                 |                           |                        |          |                           |   |          |                                           |   |          |       |   |          |                               |   |          |                      |
|----|------------------------------------------------------------------------------------------------------|-----------------------------------------------------------------------------------------------|--------------------------------------------------------------------------------------------------------------------------------------------------------------------------------------------------------------------------------------------------------------------------------------------------------------------------------------------------------------------------------------------------------------------------------------------------------------------------------------------------------------------------------------------------------------------------------------------------------|---|----------------------|----------------------------------|---------------------------------------|----------|---------------------------------|---|---------------------------------|---------------------------|------------------------|----------|---------------------------|---|----------|-------------------------------------------|---|----------|-------|---|----------|-------------------------------|---|----------|----------------------|
| 61 | [ ranking_mucus ]<br>Show the field ONLY if:<br>[treatments_maintain(3)] = '1'                       | Mucus thinners<br>e.g. Hypertonic Saline or Dornase Alfa (Pulmozyme), etc.                    | slider<br>Slider labels: Least Important , Most Important<br>Custom alignment: RH                                                                                                                                                                                                                                                                                                                                                                                                                                                                                                                      |   |                      |                                  |                                       |          |                                 |   |                                 |                           |                        |          |                           |   |          |                                           |   |          |       |   |          |                               |   |          |                      |
| 62 | [ ranking_airway ]                                                                                   | Airway clearance techniques<br>e.g. Manual Chest PT, IPV, Vest, or PEP (aerobika or acapella) | slider<br>Slider labels: Least Important , Most Important<br>Custom alignment: RH                                                                                                                                                                                                                                                                                                                                                                                                                                                                                                                      |   |                      |                                  |                                       |          |                                 |   |                                 |                           |                        |          |                           |   |          |                                           |   |          |       |   |          |                               |   |          |                      |
| 63 | [ ranking_exercise ]                                                                                 | Exercise                                                                                      | slider<br>Slider labels: Least Important , Most Important<br>Custom alignment: RH                                                                                                                                                                                                                                                                                                                                                                                                                                                                                                                      |   |                      |                                  |                                       |          |                                 |   |                                 |                           |                        |          |                           |   |          |                                           |   |          |       |   |          |                               |   |          |                      |
| 64 | [ ranking_nutrition ]                                                                                | Nutrition                                                                                     | slider<br>Slider labels: Least Important , Most Important<br>Custom alignment: RH                                                                                                                                                                                                                                                                                                                                                                                                                                                                                                                      |   |                      |                                  |                                       |          |                                 |   |                                 |                           |                        |          |                           |   |          |                                           |   |          |       |   |          |                               |   |          |                      |
| 65 | [ race ]<br>Show the field ONLY if:<br>[who_filled_out] = '1' or [who_filled_out] = '2'              | Section Header: <i>Demographics</i><br>What is your race?<br>Select ALL that apply            | checkbox<br><table border="1"> <tr><td>1</td><td>race__1</td><td>American Indian or Alaska Native</td></tr> <tr><td>2</td><td>race__2</td><td>Asian</td></tr> <tr><td>3</td><td>race__3</td><td>Black or African American</td></tr> <tr><td>4</td><td>race__4</td><td>Hispanic or Latino</td></tr> <tr><td>5</td><td>race__5</td><td>Native Hawaiian or Other Pacific Islander</td></tr> <tr><td>6</td><td>race__6</td><td>White</td></tr> <tr><td>7</td><td>race__7</td><td>Other (not represented above)</td></tr> <tr><td>8</td><td>race__8</td><td>Prefer not to answer</td></tr> </table>         | 1 | race__1              | American Indian or Alaska Native | 2                                     | race__2  | Asian                           | 3 | race__3                         | Black or African American | 4                      | race__4  | Hispanic or Latino        | 5 | race__5  | Native Hawaiian or Other Pacific Islander | 6 | race__6  | White | 7 | race__7  | Other (not represented above) | 8 | race__8  | Prefer not to answer |
| 1  | race__1                                                                                              | American Indian or Alaska Native                                                              |                                                                                                                                                                                                                                                                                                                                                                                                                                                                                                                                                                                                        |   |                      |                                  |                                       |          |                                 |   |                                 |                           |                        |          |                           |   |          |                                           |   |          |       |   |          |                               |   |          |                      |
| 2  | race__2                                                                                              | Asian                                                                                         |                                                                                                                                                                                                                                                                                                                                                                                                                                                                                                                                                                                                        |   |                      |                                  |                                       |          |                                 |   |                                 |                           |                        |          |                           |   |          |                                           |   |          |       |   |          |                               |   |          |                      |
| 3  | race__3                                                                                              | Black or African American                                                                     |                                                                                                                                                                                                                                                                                                                                                                                                                                                                                                                                                                                                        |   |                      |                                  |                                       |          |                                 |   |                                 |                           |                        |          |                           |   |          |                                           |   |          |       |   |          |                               |   |          |                      |
| 4  | race__4                                                                                              | Hispanic or Latino                                                                            |                                                                                                                                                                                                                                                                                                                                                                                                                                                                                                                                                                                                        |   |                      |                                  |                                       |          |                                 |   |                                 |                           |                        |          |                           |   |          |                                           |   |          |       |   |          |                               |   |          |                      |
| 5  | race__5                                                                                              | Native Hawaiian or Other Pacific Islander                                                     |                                                                                                                                                                                                                                                                                                                                                                                                                                                                                                                                                                                                        |   |                      |                                  |                                       |          |                                 |   |                                 |                           |                        |          |                           |   |          |                                           |   |          |       |   |          |                               |   |          |                      |
| 6  | race__6                                                                                              | White                                                                                         |                                                                                                                                                                                                                                                                                                                                                                                                                                                                                                                                                                                                        |   |                      |                                  |                                       |          |                                 |   |                                 |                           |                        |          |                           |   |          |                                           |   |          |       |   |          |                               |   |          |                      |
| 7  | race__7                                                                                              | Other (not represented above)                                                                 |                                                                                                                                                                                                                                                                                                                                                                                                                                                                                                                                                                                                        |   |                      |                                  |                                       |          |                                 |   |                                 |                           |                        |          |                           |   |          |                                           |   |          |       |   |          |                               |   |          |                      |
| 8  | race__8                                                                                              | Prefer not to answer                                                                          |                                                                                                                                                                                                                                                                                                                                                                                                                                                                                                                                                                                                        |   |                      |                                  |                                       |          |                                 |   |                                 |                           |                        |          |                           |   |          |                                           |   |          |       |   |          |                               |   |          |                      |
| 66 | [ race2 ]<br>Show the field ONLY if:<br>[who_filled_out] = '3'                                       | What is THE PATIENT'S race?<br>Select ALL that apply                                          | checkbox<br><table border="1"> <tr><td>1</td><td>race2__1</td><td>American Indian or Alaska Native</td></tr> <tr><td>2</td><td>race2__2</td><td>Asian</td></tr> <tr><td>3</td><td>race2__3</td><td>Black or African American</td></tr> <tr><td>4</td><td>race2__4</td><td>Hispanic or Latino</td></tr> <tr><td>5</td><td>race2__5</td><td>Native Hawaiian or Other Pacific Islander</td></tr> <tr><td>6</td><td>race2__6</td><td>White</td></tr> <tr><td>7</td><td>race2__7</td><td>Other (not represented above)</td></tr> <tr><td>8</td><td>race2__8</td><td>Prefer not to answer</td></tr> </table> | 1 | race2__1             | American Indian or Alaska Native | 2                                     | race2__2 | Asian                           | 3 | race2__3                        | Black or African American | 4                      | race2__4 | Hispanic or Latino        | 5 | race2__5 | Native Hawaiian or Other Pacific Islander | 6 | race2__6 | White | 7 | race2__7 | Other (not represented above) | 8 | race2__8 | Prefer not to answer |
| 1  | race2__1                                                                                             | American Indian or Alaska Native                                                              |                                                                                                                                                                                                                                                                                                                                                                                                                                                                                                                                                                                                        |   |                      |                                  |                                       |          |                                 |   |                                 |                           |                        |          |                           |   |          |                                           |   |          |       |   |          |                               |   |          |                      |
| 2  | race2__2                                                                                             | Asian                                                                                         |                                                                                                                                                                                                                                                                                                                                                                                                                                                                                                                                                                                                        |   |                      |                                  |                                       |          |                                 |   |                                 |                           |                        |          |                           |   |          |                                           |   |          |       |   |          |                               |   |          |                      |
| 3  | race2__3                                                                                             | Black or African American                                                                     |                                                                                                                                                                                                                                                                                                                                                                                                                                                                                                                                                                                                        |   |                      |                                  |                                       |          |                                 |   |                                 |                           |                        |          |                           |   |          |                                           |   |          |       |   |          |                               |   |          |                      |
| 4  | race2__4                                                                                             | Hispanic or Latino                                                                            |                                                                                                                                                                                                                                                                                                                                                                                                                                                                                                                                                                                                        |   |                      |                                  |                                       |          |                                 |   |                                 |                           |                        |          |                           |   |          |                                           |   |          |       |   |          |                               |   |          |                      |
| 5  | race2__5                                                                                             | Native Hawaiian or Other Pacific Islander                                                     |                                                                                                                                                                                                                                                                                                                                                                                                                                                                                                                                                                                                        |   |                      |                                  |                                       |          |                                 |   |                                 |                           |                        |          |                           |   |          |                                           |   |          |       |   |          |                               |   |          |                      |
| 6  | race2__6                                                                                             | White                                                                                         |                                                                                                                                                                                                                                                                                                                                                                                                                                                                                                                                                                                                        |   |                      |                                  |                                       |          |                                 |   |                                 |                           |                        |          |                           |   |          |                                           |   |          |       |   |          |                               |   |          |                      |
| 7  | race2__7                                                                                             | Other (not represented above)                                                                 |                                                                                                                                                                                                                                                                                                                                                                                                                                                                                                                                                                                                        |   |                      |                                  |                                       |          |                                 |   |                                 |                           |                        |          |                           |   |          |                                           |   |          |       |   |          |                               |   |          |                      |
| 8  | race2__8                                                                                             | Prefer not to answer                                                                          |                                                                                                                                                                                                                                                                                                                                                                                                                                                                                                                                                                                                        |   |                      |                                  |                                       |          |                                 |   |                                 |                           |                        |          |                           |   |          |                                           |   |          |       |   |          |                               |   |          |                      |
| 67 | [ patient_household_size ]                                                                           | How many people are currently living in your household, including yourself?                   | text                                                                                                                                                                                                                                                                                                                                                                                                                                                                                                                                                                                                   |   |                      |                                  |                                       |          |                                 |   |                                 |                           |                        |          |                           |   |          |                                           |   |          |       |   |          |                               |   |          |                      |
| 68 | [ patient_household_child ren ]                                                                      | How many children ≤18 years old live in your house, including yourself?                       | text                                                                                                                                                                                                                                                                                                                                                                                                                                                                                                                                                                                                   |   |                      |                                  |                                       |          |                                 |   |                                 |                           |                        |          |                           |   |          |                                           |   |          |       |   |          |                               |   |          |                      |
| 69 | [ patient_education ]<br>Show the field ONLY if:<br>[who_filled_out] = '1' or [who_filled_out] = '2' | What is the highest grade you have completed?                                                 | radio<br><table border="1"> <tr><td>1</td><td>Preschool or Younger</td></tr> <tr><td>2</td><td>Elementary (Kindergarten - 5th Grade)</td></tr> <tr><td>3</td><td>Middle School (6th - 8th Grade)</td></tr> <tr><td>4</td><td>High School: (9th - 12th grade)</td></tr> <tr><td>5</td><td>College/Junior College</td></tr> <tr><td>6</td><td>Graduate School or Beyond</td></tr> </table>                                                                                                                                                                                                               | 1 | Preschool or Younger | 2                                | Elementary (Kindergarten - 5th Grade) | 3        | Middle School (6th - 8th Grade) | 4 | High School: (9th - 12th grade) | 5                         | College/Junior College | 6        | Graduate School or Beyond |   |          |                                           |   |          |       |   |          |                               |   |          |                      |
| 1  | Preschool or Younger                                                                                 |                                                                                               |                                                                                                                                                                                                                                                                                                                                                                                                                                                                                                                                                                                                        |   |                      |                                  |                                       |          |                                 |   |                                 |                           |                        |          |                           |   |          |                                           |   |          |       |   |          |                               |   |          |                      |
| 2  | Elementary (Kindergarten - 5th Grade)                                                                |                                                                                               |                                                                                                                                                                                                                                                                                                                                                                                                                                                                                                                                                                                                        |   |                      |                                  |                                       |          |                                 |   |                                 |                           |                        |          |                           |   |          |                                           |   |          |       |   |          |                               |   |          |                      |
| 3  | Middle School (6th - 8th Grade)                                                                      |                                                                                               |                                                                                                                                                                                                                                                                                                                                                                                                                                                                                                                                                                                                        |   |                      |                                  |                                       |          |                                 |   |                                 |                           |                        |          |                           |   |          |                                           |   |          |       |   |          |                               |   |          |                      |
| 4  | High School: (9th - 12th grade)                                                                      |                                                                                               |                                                                                                                                                                                                                                                                                                                                                                                                                                                                                                                                                                                                        |   |                      |                                  |                                       |          |                                 |   |                                 |                           |                        |          |                           |   |          |                                           |   |          |       |   |          |                               |   |          |                      |
| 5  | College/Junior College                                                                               |                                                                                               |                                                                                                                                                                                                                                                                                                                                                                                                                                                                                                                                                                                                        |   |                      |                                  |                                       |          |                                 |   |                                 |                           |                        |          |                           |   |          |                                           |   |          |       |   |          |                               |   |          |                      |
| 6  | Graduate School or Beyond                                                                            |                                                                                               |                                                                                                                                                                                                                                                                                                                                                                                                                                                                                                                                                                                                        |   |                      |                                  |                                       |          |                                 |   |                                 |                           |                        |          |                           |   |          |                                           |   |          |       |   |          |                               |   |          |                      |
| 70 | [ patient_education_2 ]<br>Show the field ONLY if:<br>[who_filled_out] = '3'                         | What is the highest grade your child (THE PATIENT) has completed?                             | radio<br><table border="1"> <tr><td>1</td><td>Preschool or Younger</td></tr> <tr><td>2</td><td>Elementary (Kindergarten - 5th Grade)</td></tr> <tr><td>3</td><td>Middle School (6th - 8th Grade)</td></tr> <tr><td>4</td><td>High School: (9th - 12th grade)</td></tr> <tr><td>5</td><td>College/Junior College</td></tr> <tr><td>6</td><td>Graduate School or Beyond</td></tr> </table>                                                                                                                                                                                                               | 1 | Preschool or Younger | 2                                | Elementary (Kindergarten - 5th Grade) | 3        | Middle School (6th - 8th Grade) | 4 | High School: (9th - 12th grade) | 5                         | College/Junior College | 6        | Graduate School or Beyond |   |          |                                           |   |          |       |   |          |                               |   |          |                      |
| 1  | Preschool or Younger                                                                                 |                                                                                               |                                                                                                                                                                                                                                                                                                                                                                                                                                                                                                                                                                                                        |   |                      |                                  |                                       |          |                                 |   |                                 |                           |                        |          |                           |   |          |                                           |   |          |       |   |          |                               |   |          |                      |
| 2  | Elementary (Kindergarten - 5th Grade)                                                                |                                                                                               |                                                                                                                                                                                                                                                                                                                                                                                                                                                                                                                                                                                                        |   |                      |                                  |                                       |          |                                 |   |                                 |                           |                        |          |                           |   |          |                                           |   |          |       |   |          |                               |   |          |                      |
| 3  | Middle School (6th - 8th Grade)                                                                      |                                                                                               |                                                                                                                                                                                                                                                                                                                                                                                                                                                                                                                                                                                                        |   |                      |                                  |                                       |          |                                 |   |                                 |                           |                        |          |                           |   |          |                                           |   |          |       |   |          |                               |   |          |                      |
| 4  | High School: (9th - 12th grade)                                                                      |                                                                                               |                                                                                                                                                                                                                                                                                                                                                                                                                                                                                                                                                                                                        |   |                      |                                  |                                       |          |                                 |   |                                 |                           |                        |          |                           |   |          |                                           |   |          |       |   |          |                               |   |          |                      |
| 5  | College/Junior College                                                                               |                                                                                               |                                                                                                                                                                                                                                                                                                                                                                                                                                                                                                                                                                                                        |   |                      |                                  |                                       |          |                                 |   |                                 |                           |                        |          |                           |   |          |                                           |   |          |       |   |          |                               |   |          |                      |
| 6  | Graduate School or Beyond                                                                            |                                                                                               |                                                                                                                                                                                                                                                                                                                                                                                                                                                                                                                                                                                                        |   |                      |                                  |                                       |          |                                 |   |                                 |                           |                        |          |                           |   |          |                                           |   |          |       |   |          |                               |   |          |                      |

|    |                                                                                              |                                                                     |                                                                                                                                                                                                                                                                                                                                                                                                                                                                                                                                                                                         |   |                                   |         |                                          |                  |                                                                                 |   |                                                  |                  |                               |                  |                                                          |   |                                                          |
|----|----------------------------------------------------------------------------------------------|---------------------------------------------------------------------|-----------------------------------------------------------------------------------------------------------------------------------------------------------------------------------------------------------------------------------------------------------------------------------------------------------------------------------------------------------------------------------------------------------------------------------------------------------------------------------------------------------------------------------------------------------------------------------------|---|-----------------------------------|---------|------------------------------------------|------------------|---------------------------------------------------------------------------------|---|--------------------------------------------------|------------------|-------------------------------|------------------|----------------------------------------------------------|---|----------------------------------------------------------|
| 71 | [parent_degree_2]<br>Show the field ONLY if:<br>[who_filled_out] = '1'                       | What is the highest degree your parent or caregiver has earned?     | radio<br><table border="1"> <tr><td>1</td><td>Some high school or less</td></tr> <tr><td>2</td><td>High school diploma or equivalency (GED)</td></tr> <tr><td>3</td><td>Associate degree (junior college) or vocational degree/license</td></tr> <tr><td>4</td><td>Bachelor's degree</td></tr> <tr><td>5</td><td>Master's degree</td></tr> <tr><td>6</td><td>Doctorate, Professional (MD, JD, DDS, PhD, etc)</td></tr> <tr><td>7</td><td>None of the above</td></tr> </table>                                                                                                           | 1 | Some high school or less          | 2       | High school diploma or equivalency (GED) | 3                | Associate degree (junior college) or vocational degree/license                  | 4 | Bachelor's degree                                | 5                | Master's degree               | 6                | Doctorate, Professional (MD, JD, DDS, PhD, etc)          | 7 | None of the above                                        |
| 1  | Some high school or less                                                                     |                                                                     |                                                                                                                                                                                                                                                                                                                                                                                                                                                                                                                                                                                         |   |                                   |         |                                          |                  |                                                                                 |   |                                                  |                  |                               |                  |                                                          |   |                                                          |
| 2  | High school diploma or equivalency (GED)                                                     |                                                                     |                                                                                                                                                                                                                                                                                                                                                                                                                                                                                                                                                                                         |   |                                   |         |                                          |                  |                                                                                 |   |                                                  |                  |                               |                  |                                                          |   |                                                          |
| 3  | Associate degree (junior college) or vocational degree/license                               |                                                                     |                                                                                                                                                                                                                                                                                                                                                                                                                                                                                                                                                                                         |   |                                   |         |                                          |                  |                                                                                 |   |                                                  |                  |                               |                  |                                                          |   |                                                          |
| 4  | Bachelor's degree                                                                            |                                                                     |                                                                                                                                                                                                                                                                                                                                                                                                                                                                                                                                                                                         |   |                                   |         |                                          |                  |                                                                                 |   |                                                  |                  |                               |                  |                                                          |   |                                                          |
| 5  | Master's degree                                                                              |                                                                     |                                                                                                                                                                                                                                                                                                                                                                                                                                                                                                                                                                                         |   |                                   |         |                                          |                  |                                                                                 |   |                                                  |                  |                               |                  |                                                          |   |                                                          |
| 6  | Doctorate, Professional (MD, JD, DDS, PhD, etc)                                              |                                                                     |                                                                                                                                                                                                                                                                                                                                                                                                                                                                                                                                                                                         |   |                                   |         |                                          |                  |                                                                                 |   |                                                  |                  |                               |                  |                                                          |   |                                                          |
| 7  | None of the above                                                                            |                                                                     |                                                                                                                                                                                                                                                                                                                                                                                                                                                                                                                                                                                         |   |                                   |         |                                          |                  |                                                                                 |   |                                                  |                  |                               |                  |                                                          |   |                                                          |
| 72 | [parent_degree]<br>Show the field ONLY if:<br>[who_filled_out] = '3'                         | What is the highest degree you (THE PARENT/CAREGIVER) earned?       | radio<br><table border="1"> <tr><td>1</td><td>Some high school or less</td></tr> <tr><td>2</td><td>High school diploma or equivalency (GED)</td></tr> <tr><td>3</td><td>Associate degree (junior college) or vocational degree/license</td></tr> <tr><td>4</td><td>Bachelor's degree</td></tr> <tr><td>5</td><td>Master's degree</td></tr> <tr><td>6</td><td>Doctorate, Professional (MD, JD, DDS, PhD, etc)</td></tr> <tr><td>7</td><td>None of the above</td></tr> </table>                                                                                                           | 1 | Some high school or less          | 2       | High school diploma or equivalency (GED) | 3                | Associate degree (junior college) or vocational degree/license                  | 4 | Bachelor's degree                                | 5                | Master's degree               | 6                | Doctorate, Professional (MD, JD, DDS, PhD, etc)          | 7 | None of the above                                        |
| 1  | Some high school or less                                                                     |                                                                     |                                                                                                                                                                                                                                                                                                                                                                                                                                                                                                                                                                                         |   |                                   |         |                                          |                  |                                                                                 |   |                                                  |                  |                               |                  |                                                          |   |                                                          |
| 2  | High school diploma or equivalency (GED)                                                     |                                                                     |                                                                                                                                                                                                                                                                                                                                                                                                                                                                                                                                                                                         |   |                                   |         |                                          |                  |                                                                                 |   |                                                  |                  |                               |                  |                                                          |   |                                                          |
| 3  | Associate degree (junior college) or vocational degree/license                               |                                                                     |                                                                                                                                                                                                                                                                                                                                                                                                                                                                                                                                                                                         |   |                                   |         |                                          |                  |                                                                                 |   |                                                  |                  |                               |                  |                                                          |   |                                                          |
| 4  | Bachelor's degree                                                                            |                                                                     |                                                                                                                                                                                                                                                                                                                                                                                                                                                                                                                                                                                         |   |                                   |         |                                          |                  |                                                                                 |   |                                                  |                  |                               |                  |                                                          |   |                                                          |
| 5  | Master's degree                                                                              |                                                                     |                                                                                                                                                                                                                                                                                                                                                                                                                                                                                                                                                                                         |   |                                   |         |                                          |                  |                                                                                 |   |                                                  |                  |                               |                  |                                                          |   |                                                          |
| 6  | Doctorate, Professional (MD, JD, DDS, PhD, etc)                                              |                                                                     |                                                                                                                                                                                                                                                                                                                                                                                                                                                                                                                                                                                         |   |                                   |         |                                          |                  |                                                                                 |   |                                                  |                  |                               |                  |                                                          |   |                                                          |
| 7  | None of the above                                                                            |                                                                     |                                                                                                                                                                                                                                                                                                                                                                                                                                                                                                                                                                                         |   |                                   |         |                                          |                  |                                                                                 |   |                                                  |                  |                               |                  |                                                          |   |                                                          |
| 73 | [work_status]<br>Show the field ONLY if:<br>[who_filled_out] = '1' or [who_filled_out] = '2' | What is your current work or school status?                         | radio<br><table border="1"> <tr><td>1</td><td>Attending school outside the home</td></tr> <tr><td>2</td><td>Attending classes from home</td></tr> <tr><td>3</td><td>Working full or part time (either outside the home or at a home-based business)</td></tr> <tr><td>4</td><td>Not attending school or working due to my health</td></tr> <tr><td>5</td><td>Not working for other reasons</td></tr> <tr><td>6</td><td>Too young for school, attending day care outside of home</td></tr> <tr><td>7</td><td>Too young for school, attending day care within the home</td></tr> </table> | 1 | Attending school outside the home | 2       | Attending classes from home              | 3                | Working full or part time (either outside the home or at a home-based business) | 4 | Not attending school or working due to my health | 5                | Not working for other reasons | 6                | Too young for school, attending day care outside of home | 7 | Too young for school, attending day care within the home |
| 1  | Attending school outside the home                                                            |                                                                     |                                                                                                                                                                                                                                                                                                                                                                                                                                                                                                                                                                                         |   |                                   |         |                                          |                  |                                                                                 |   |                                                  |                  |                               |                  |                                                          |   |                                                          |
| 2  | Attending classes from home                                                                  |                                                                     |                                                                                                                                                                                                                                                                                                                                                                                                                                                                                                                                                                                         |   |                                   |         |                                          |                  |                                                                                 |   |                                                  |                  |                               |                  |                                                          |   |                                                          |
| 3  | Working full or part time (either outside the home or at a home-based business)              |                                                                     |                                                                                                                                                                                                                                                                                                                                                                                                                                                                                                                                                                                         |   |                                   |         |                                          |                  |                                                                                 |   |                                                  |                  |                               |                  |                                                          |   |                                                          |
| 4  | Not attending school or working due to my health                                             |                                                                     |                                                                                                                                                                                                                                                                                                                                                                                                                                                                                                                                                                                         |   |                                   |         |                                          |                  |                                                                                 |   |                                                  |                  |                               |                  |                                                          |   |                                                          |
| 5  | Not working for other reasons                                                                |                                                                     |                                                                                                                                                                                                                                                                                                                                                                                                                                                                                                                                                                                         |   |                                   |         |                                          |                  |                                                                                 |   |                                                  |                  |                               |                  |                                                          |   |                                                          |
| 6  | Too young for school, attending day care outside of home                                     |                                                                     |                                                                                                                                                                                                                                                                                                                                                                                                                                                                                                                                                                                         |   |                                   |         |                                          |                  |                                                                                 |   |                                                  |                  |                               |                  |                                                          |   |                                                          |
| 7  | Too young for school, attending day care within the home                                     |                                                                     |                                                                                                                                                                                                                                                                                                                                                                                                                                                                                                                                                                                         |   |                                   |         |                                          |                  |                                                                                 |   |                                                  |                  |                               |                  |                                                          |   |                                                          |
| 74 | [work_status_2]<br>Show the field ONLY if:<br>[who_filled_out] = '3'                         | What is your child's (THE PATIENT'S) current work or school status? | radio<br><table border="1"> <tr><td>1</td><td>Attending school outside the home</td></tr> <tr><td>2</td><td>Attending classes from home</td></tr> <tr><td>3</td><td>Working full or part time (either outside the home or at a home-based business)</td></tr> <tr><td>4</td><td>Not attending school or working due to my health</td></tr> <tr><td>5</td><td>Not working for other reasons</td></tr> <tr><td>6</td><td>Too young for school, attending day care outside of home</td></tr> <tr><td>7</td><td>Too young for school, attending day care within the home</td></tr> </table> | 1 | Attending school outside the home | 2       | Attending classes from home              | 3                | Working full or part time (either outside the home or at a home-based business) | 4 | Not attending school or working due to my health | 5                | Not working for other reasons | 6                | Too young for school, attending day care outside of home | 7 | Too young for school, attending day care within the home |
| 1  | Attending school outside the home                                                            |                                                                     |                                                                                                                                                                                                                                                                                                                                                                                                                                                                                                                                                                                         |   |                                   |         |                                          |                  |                                                                                 |   |                                                  |                  |                               |                  |                                                          |   |                                                          |
| 2  | Attending classes from home                                                                  |                                                                     |                                                                                                                                                                                                                                                                                                                                                                                                                                                                                                                                                                                         |   |                                   |         |                                          |                  |                                                                                 |   |                                                  |                  |                               |                  |                                                          |   |                                                          |
| 3  | Working full or part time (either outside the home or at a home-based business)              |                                                                     |                                                                                                                                                                                                                                                                                                                                                                                                                                                                                                                                                                                         |   |                                   |         |                                          |                  |                                                                                 |   |                                                  |                  |                               |                  |                                                          |   |                                                          |
| 4  | Not attending school or working due to my health                                             |                                                                     |                                                                                                                                                                                                                                                                                                                                                                                                                                                                                                                                                                                         |   |                                   |         |                                          |                  |                                                                                 |   |                                                  |                  |                               |                  |                                                          |   |                                                          |
| 5  | Not working for other reasons                                                                |                                                                     |                                                                                                                                                                                                                                                                                                                                                                                                                                                                                                                                                                                         |   |                                   |         |                                          |                  |                                                                                 |   |                                                  |                  |                               |                  |                                                          |   |                                                          |
| 6  | Too young for school, attending day care outside of home                                     |                                                                     |                                                                                                                                                                                                                                                                                                                                                                                                                                                                                                                                                                                         |   |                                   |         |                                          |                  |                                                                                 |   |                                                  |                  |                               |                  |                                                          |   |                                                          |
| 7  | Too young for school, attending day care within the home                                     |                                                                     |                                                                                                                                                                                                                                                                                                                                                                                                                                                                                                                                                                                         |   |                                   |         |                                          |                  |                                                                                 |   |                                                  |                  |                               |                  |                                                          |   |                                                          |
| 75 | [who_completed]                                                                              | Who completed this survey?<br>Select ALL that apply                 | checkbox<br><table border="1"> <tr><td>1</td><td>who_completed__1</td><td>Patient</td></tr> <tr><td>2</td><td>who_completed__2</td><td>Patient's Parent / Caregiver</td></tr> <tr><td>3</td><td>who_completed__3</td><td>Patient's Spouse</td></tr> <tr><td>4</td><td>who_completed__4</td><td>Other</td></tr> </table>                                                                                                                                                                                                                                                                 | 1 | who_completed__1                  | Patient | 2                                        | who_completed__2 | Patient's Parent / Caregiver                                                    | 3 | who_completed__3                                 | Patient's Spouse | 4                             | who_completed__4 | Other                                                    |   |                                                          |
| 1  | who_completed__1                                                                             | Patient                                                             |                                                                                                                                                                                                                                                                                                                                                                                                                                                                                                                                                                                         |   |                                   |         |                                          |                  |                                                                                 |   |                                                  |                  |                               |                  |                                                          |   |                                                          |
| 2  | who_completed__2                                                                             | Patient's Parent / Caregiver                                        |                                                                                                                                                                                                                                                                                                                                                                                                                                                                                                                                                                                         |   |                                   |         |                                          |                  |                                                                                 |   |                                                  |                  |                               |                  |                                                          |   |                                                          |
| 3  | who_completed__3                                                                             | Patient's Spouse                                                    |                                                                                                                                                                                                                                                                                                                                                                                                                                                                                                                                                                                         |   |                                   |         |                                          |                  |                                                                                 |   |                                                  |                  |                               |                  |                                                          |   |                                                          |
| 4  | who_completed__4                                                                             | Other                                                               |                                                                                                                                                                                                                                                                                                                                                                                                                                                                                                                                                                                         |   |                                   |         |                                          |                  |                                                                                 |   |                                                  |                  |                               |                  |                                                          |   |                                                          |
| 76 | [pt_survey_complete]                                                                         | Section Header: Form Status<br>Complete?                            | dropdown<br><table border="1"> <tr><td>0</td><td>Incomplete</td></tr> <tr><td>1</td><td>Unverified</td></tr> <tr><td>2</td><td>Complete</td></tr> </table>                                                                                                                                                                                                                                                                                                                                                                                                                              | 0 | Incomplete                        | 1       | Unverified                               | 2                | Complete                                                                        |   |                                                  |                  |                               |                  |                                                          |   |                                                          |
| 0  | Incomplete                                                                                   |                                                                     |                                                                                                                                                                                                                                                                                                                                                                                                                                                                                                                                                                                         |   |                                   |         |                                          |                  |                                                                                 |   |                                                  |                  |                               |                  |                                                          |   |                                                          |
| 1  | Unverified                                                                                   |                                                                     |                                                                                                                                                                                                                                                                                                                                                                                                                                                                                                                                                                                         |   |                                   |         |                                          |                  |                                                                                 |   |                                                  |                  |                               |                  |                                                          |   |                                                          |
| 2  | Complete                                                                                     |                                                                     |                                                                                                                                                                                                                                                                                                                                                                                                                                                                                                                                                                                         |   |                                   |         |                                          |                  |                                                                                 |   |                                                  |                  |                               |                  |                                                          |   |                                                          |
