# Supplementary material for: Patient and Caregiver Perceptions of Airway Clearance Methods Used for Cystic Fibrosis
Source: Can Respir J. 2023 Jul 28;2023:1422319. doi: 10.1155/2023/1422319 (PMC10403321; doi:10.1155/2023/1422319)
Supplement: Supplementary Materials — Supplemental Data 1. Perceived importance of airway clearance importance by age and gender. Supplemental Data 2. Perceived importance of exercise importance by age and gender. Supplemental Data 3. Perceived importance of airway clearance, stratified by survey respondent (self vs. proxy respondent). REDCap Codebook. [file 1422319.f1.zip]

Archive with 2 entries (2 files):
- Airway Clearance Manuscript Supplement 12_5_2022.docx
- REDCap Codebook.pdf
